# Supplementary material for: Effects of Sun Withering Degree on Black Tea Quality Revealed via Non-Targeted Metabolomics
Source: MDPI journal article supplement (doi:10.3390/foods12122430), 2023-06-20
Supplement: s1 [file s1]

### **Supplemental information:**

Table S1. Experimental reagent information.

Table S2. Results of main environmental factors of black tea with different degrees of sun withering.

Table S3. Sensory evaluation results of black tea with different degrees of sun withering.

Table S4. Information on non-volatile compounds of black tea with different degrees of sun withering.

Table S5. Relative content of non-volatile compounds of black tea with different degrees of sun withering (mg/g).

Table S6. Correlation analysis between non-volatile components and sensory evaluation of black tea with different degrees of sun withering.

Table S7. Analysis results of the main physicochemical components of black tea with different degrees of sun withering (%).

Table S8. Relative content of volatile compounds in black tea with different degrees of sun withering (ug/g).

Figures S1. Aromatic amino acid content of black tea with different degrees of sun withering.

Figure S2. Key volatiles content of black tea with different degrees of sun withering.

**Table S1. Experimental reagent information.**

| Reagents                   | Manufacturers                           | Purity | Catalogue number | Suppliers |
|----------------------------|-----------------------------------------|--------|------------------|-----------|
| L-Glutamine                | Shanghai Yuanye Bio-Technology Co., Ltd | ≥98%   | B21917-200mg     | Yuanye    |
| L-Lysine                   | Shanghai Yuanye Bio-Technology Co., Ltd | ≥98%   | B21922-200mg     | Yuanye    |
| L-Arginine                 | Shanghai Yuanye Bio-Technology Co., Ltd | ≥98%   | B21920-200mg     | Yuanye    |
| L-Isoleucine               | Shanghai Yuanye Bio-Technology Co., Ltd | ≥98%   | B21937-200mg     | Yuanye    |
| L-Leucine                  | Shanghai Yuanye Bio-Technology Co., Ltd | ≥98%   | B21925-200mg     | Yuanye    |
| L-Phenylalanine            | Shanghai Yuanye Bio-Technology Co., Ltd | 99%    | S20063-25g       | Yuanye    |
| L-Tryptophan               | Shanghai Yuanye Bio-Technology Co., Ltd | ≥98%   | B21930-200mg     | Yuanye    |
| L-Aspartic acid            | Shanghai Yuanye Bio-Technology Co., Ltd | ≥99%   | B21934-200mg     | Yuanye    |
| L-Asparagine               | Shanghai Yuanye Bio-Technology Co., Ltd | ≥98%   | B21935-200mg     | Yuanye    |
| L-Glutamic acid            | Shanghai Yuanye Bio-Technology Co., Ltd | ≥99%   | B21916-200mg     | Yuanye    |
| L-Threonine                | Shanghai Yuanye Bio-Technology Co., Ltd | ≥98%   | B21933-200mg     | Yuanye    |
| L-Proline                  | Shanghai Yuanye Bio-Technology Co., Ltd | 99%    | S20347-25g       | Yuanye    |
| L-Valine                   | Shanghai Yuanye Bio-Technology Co., Ltd | ≥98%   | B21936-200mg     | Yuanye    |
| L-Tyrosine                 | Shanghai Yuanye Bio-Technology Co., Ltd | 95%    | S72728-25g       | Yuanye    |
| L-Methionin                | Shanghai Yuanye Bio-Technology Co., Ltd | ≥98%   | B21913-200mg     | Yuanye    |
| L-Theamine                 | Shanghai Yuanye Bio-Technology Co., Ltd | ≥98%   | B21912-20mg      | Yuanye    |
| Theaflavin                 | Shanghai Yuanye Bio-Technology Co., Ltd | ≥95%   | B20140-20mg      | Yuanye    |
| Theaflavin-3-gallate       | Shanghai Yuanye Bio-Technology Co., Ltd | ≥98%   | B20143-20mg      | Yuanye    |
| Theaflavin-3'-gallate      | Shanghai Yuanye Bio-Technology Co., Ltd | ≥98%   | B20142-20mg      | Yuanye    |
| Theaflavine-3,3'-digallate | Shanghai Yuanye Bio-Technology Co., Ltd | ≥98%   | B50785-10mg      | Yuanye    |

|                                           |                                         |       |             |        |
|-------------------------------------------|-----------------------------------------|-------|-------------|--------|
| (-)-Gallocatechin/GC                      | Shanghai Yuanye Bio-Technology Co., Ltd | ≥98%  | B30661-5mg  | Yuanye |
| (-)-Epigallocatechin/EGC                  | Shanghai Yuanye Bio-Technology Co., Ltd | ≥98%  | B20105-20mg | Yuanye |
| (+)-Catechin/C                            | Shanghai Yuanye Bio-Technology Co., Ltd | ≥98%  | A10025-20mg | Yuanye |
| Epicatechin /EC                           | Shanghai Yuanye Bio-Technology Co., Ltd | 99.4% | A10044-20mg | Yuanye |
| Epigallocatechin gallate/EGCG             | Shanghai Yuanye Bio-Technology Co., Ltd | ≥98%  | B20106-20mg | Yuanye |
| (-)-Gallocatechin gallate/GCG             | Shanghai Yuanye Bio-Technology Co., Ltd | ≥98%  | B20850-20mg | Yuanye |
| (-)-Epicatechin gallate/ECG               | Shanghai Yuanye Bio-Technology Co., Ltd | ≥98%  | B20103-20mg | Yuanye |
| Catechin gallate/CG                       | Shanghai Yuanye Bio-Technology Co., Ltd | ≥98%  | B20350-20mg | Yuanye |
| Theobromine                               | Shanghai Yuanye Bio-Technology Co., Ltd | ≥98%  | B73891-2mg  | Yuanye |
| Theophylline                              | Shanghai Yuanye Bio-Technology Co., Ltd | ≥98%  | B20144-50mg | Yuanye |
| Caffeine                                  | Shanghai Yuanye Bio-Technology Co., Ltd | ≥95%  | B81798-10mg | Yuanye |
| (-)-Epiafzelechin                         | Shanghai Yuanye Bio-Technology Co., Ltd | ≥98%  | B30490-5mg  | Yuanye |
| Kaempferide                               | Shanghai Yuanye Bio-Technology Co., Ltd | ≥98%  | B21132-20mg | Yuanye |
| Quercetin                                 | Shanghai Yuanye Bio-Technology Co., Ltd | ≥98%  | B20527-20mg | Yuanye |
| Myricetin                                 | Shanghai Yuanye Bio-Technology Co., Ltd | ≥98%  | B21458-20mg | Yuanye |
| Vitexin                                   | Shanghai Yuanye Bio-Technology Co., Ltd | 98.5% | A10063-20mg | Yuanye |
| Isovitexin                                | Shanghai Yuanye Bio-Technology Co., Ltd | ≥98%  | B21544-20mg | Yuanye |
| Quercitrin                                | Shanghai Yuanye Bio-Technology Co., Ltd | ≥98%  | B20526-20mg | Yuanye |
| Astragaline                               | Shanghai Yuanye Bio-Technology Co., Ltd | ≥98%  | B21704-20mg | Yuanye |
| Quercetin-7- O- $\alpha$ -L-rhamnoside    | Shanghai Yuanye Bio-Technology Co., Ltd | ≥98%  | B20530-20mg | Yuanye |
| Quercetin-7-O- $\beta$ -D-glucopyranoside | Shanghai Yuanye Bio-Technology Co., Ltd | ≥98%  | B20531-10mg | Yuanye |
| Hyperoside                                | Shanghai Yuanye Bio-Technology Co., Ltd | ≥98%  | B20631-20mg | Yuanye |
| Isovitexin 2"-O-arabinoside               | Shanghai Yuanye Bio-Technology Co., Ltd | ≥98%  | B28111-10mg | Yuanye |
| Glucosyl-vitexin                          | Shanghai Yuanye Bio-Technology Co., Ltd | ≥98%  | B50220-20mg | Yuanye |
| Quercetin-3-o-rutinose                    | Shanghai Yuanye Bio-Technology Co., Ltd | ≥98%  | B50405-5mg  | Yuanye |

|                                              |                                         |      |              |        |
|----------------------------------------------|-----------------------------------------|------|--------------|--------|
| Procyanidin B1                               | Shanghai Yuanye Bio-Technology Co., Ltd | ≥95% | B21616-20mg  | Yuanye |
| Procyanidin B2                               | Shanghai Yuanye Bio-Technology Co., Ltd | ≥98% | B21617-20mg  | Yuanye |
| Quercetin-3-O-D-glucosyl]-(1-2)-L-rhamnoside | Shanghai Yuanye Bio-Technology Co., Ltd | ≥98% | B24587-10mg  | Yuanye |
| Kaempferol                                   | Shanghai Yuanye Bio-Technology Co., Ltd | ≥98% | B21126-20mg  | Yuanye |
| Myricetin 3-O-galactoside                    | Shanghai Yuanye Bio-Technology Co., Ltd | ≥98% | B30932-5mg   | Yuanye |
| Fumaric acid                                 | Shanghai Yuanye Bio-Technology Co., Ltd | 98%  | B72471-1mg   | Yuanye |
| α-Ketoglutaric acid                          | Shanghai Yuanye Bio-Technology Co., Ltd | ≥98% | B24374-20mg  | Yuanye |
| Shikimic acid                                | Shanghai Yuanye Bio-Technology Co., Ltd | ≥98% | B20838-20mg  | Yuanye |
| Caffeic acid                                 | Shanghai Yuanye Bio-Technology Co., Ltd | ≥98% | B20660-20mg  | Yuanye |
| Chlorogenic acid                             | Shanghai Yuanye Bio-Technology Co., Ltd | ≥98% | B20782-20mg  | Yuanye |
| Gallic acid                                  | Shanghai Yuanye Bio-Technology Co., Ltd | ≥98% | B20851-20mg  | Yuanye |
| Etofylline                                   | Shanghai Yuanye Bio-Technology Co., Ltd | 99%  | S71039-25g   | Yuanye |
| Cyclohexanone                                | Shanghai Yuanye Bio-Technology Co., Ltd | ≥95% | B72470-100mg | Yuanye |

**Table S2. Results of main environmental factors of black tea with different degrees of sun withering.**

| Withering degree | Withering method | Withering time (h) |                    |            | Temperature (°C) |         | Humidity (%) |         | Light intensity (Lux) |         |
|------------------|------------------|--------------------|--------------------|------------|------------------|---------|--------------|---------|-----------------------|---------|
|                  |                  | Withering time     | Withering duration | Total time | Range            | Average | Range        | Average | Range                 | Average |
| CK               | \                | \                  | \                  | 10.7       | \                | \       | \            | \       | \                     | \       |
|                  | Indoor           | 11:00--21:40       | 10.7               |            | 24~29            | 26.5    | 40~64        | 52.5    | 34~68                 | 51.2    |
| S72              | sun              | 11:00--12:00       | 1.0                | 4.1        | 30~32            | 31.2    | 20~22        | 21.5    | 23420~24420           | 23920.4 |
|                  | Indoor           | 12:00--15:05       | 3.1                |            | 24~27            | 26.3    | 40~64        | 52.5    | 34~68                 | 51.4    |
| S69              | sun              | 11:00--12:10       | 1.2                | 4.2        | 30~32            | 31.2    | 20~22        | 21.5    | 23420~24420           | 23920.2 |
|                  | Indoor           | 12:10--14:55       | 3.1                |            | 24~27            | 26.3    | 40~64        | 52.5    | 34~68                 | 51.3    |
| S66              | sun              | 11:00--12:40       | 1.6                | 2.9        | 30~32            | 31.2    | 20~22        | 21.5    | 23420~24420           | 23402.1 |
|                  | Indoor           | 12:40--14:35       | 1.3                |            | 24~27            | 26.3    | 40~64        | 52.5    | 34~68                 | 51.1    |
| S63              | sun              | 11:00-- 12:50      | 1.8                | 3.0        | 30~32            | 31.2    | 20~22        | 21.5    | 22320~23420           | 22870.3 |

|     |        |              |     |     |       |      |       |      |             |         |
|-----|--------|--------------|-----|-----|-------|------|-------|------|-------------|---------|
|     | Indoor | 12:50--13:20 | 1.2 |     | 24~27 | 26.3 | 40~64 | 52.5 | 34~68       | 51.4    |
| S60 | sun    | 11:00-13:20  | 2.4 | 2.4 | 30~32 | 31.2 | 20~22 | 21.5 | 22320~23420 | 22870.4 |
|     | \      | \            | \   |     | \     | \    | \     | \    | \           | \       |

**Table S3. Sensory evaluation results of black tea with different degrees of sun withering.**

| Withering degree | Appearance      | Brew color        | Aroma                | Taste                          | Infused leaf   |
|------------------|-----------------|-------------------|----------------------|--------------------------------|----------------|
| CK               | brownish auburn | orange red bright | grass odour          | slightly grassy and astringent | red and clear  |
| S72              | brownish auburn | red bright        | slightly grass odour | slightly astringent            | red and bright |
| S69              | brownish auburn | red bright        | pure sweet           | Sweet and mellow               | red and bright |
| S66              | brownish auburn | red bright        | sweet                | Sweet and mellow               | red and bright |
| S63              | brownish auburn | red bright        | slightly high        | Sweet and mellow               | red and bright |
| S60              | brownish auburn | red bright        | pure and normal      | mellow                         | red and bright |

**Table S4. Information on non-volatile compounds of black tea with different degrees of sun withering.**

| NO | Compounds          | Formula                                                       | Theoretical mass(m/z) | MS/MS fragments               |
|----|--------------------|---------------------------------------------------------------|-----------------------|-------------------------------|
|    | <b>Amino acids</b> |                                                               |                       |                               |
| 1  | L-Glutamine        | C <sub>5</sub> H <sub>10</sub> N <sub>2</sub> O <sub>3</sub>  | 147.0764              | 130,84,56                     |
| 2  | L-Lysine           | C <sub>6</sub> H <sub>14</sub> N <sub>2</sub> O <sub>2</sub>  | 147.1128              | 102,84,56                     |
| 3  | L-Arginine         | C <sub>6</sub> H <sub>14</sub> N <sub>4</sub> O <sub>2</sub>  | 175.1190              | 158,130,116,70,60             |
| 4  | L-Isoleucine       | C <sub>6</sub> H <sub>13</sub> NO <sub>2</sub>                | 132.1019              | 86,69,57                      |
| 5  | L-Leucine          | C <sub>6</sub> H <sub>13</sub> NO <sub>2</sub>                | 132.1019              | 86,69,55                      |
| 6  | L-Phenylalanine    | C <sub>9</sub> H <sub>11</sub> NO <sub>2</sub>                | 166.0863              | 120,103,77,51                 |
| 7  | L-Tryptophan       | C <sub>11</sub> H <sub>12</sub> N <sub>2</sub> O <sub>2</sub> | 205.0972              | 188,170,146,118               |
| 8  | L-Aspartic acid    | C <sub>4</sub> H <sub>7</sub> NO <sub>4</sub>                 | 134.0448              | 88,74,61                      |
| 9  | L-Asparagine       | C <sub>4</sub> H <sub>8</sub> N <sub>2</sub> O <sub>3</sub>   | 133.0608              | 87,74,70,60                   |
| 10 | L-Glutamic acid    | C <sub>5</sub> H <sub>9</sub> NO <sub>4</sub>                 | 148.0604              | 130,102,84,56                 |
| 11 | L-Threonine        | C <sub>4</sub> H <sub>9</sub> NO <sub>3</sub>                 | 120.0655              | 94,74,56                      |
| 12 | L-Proline          | C <sub>5</sub> H <sub>9</sub> NO <sub>2</sub>                 | 116.0706              | 70                            |
| 13 | L-Valine           | C <sub>5</sub> H <sub>11</sub> NO <sub>2</sub>                | 118.0863              | 72,55                         |
| 14 | L-Tyrosine         | C <sub>9</sub> H <sub>11</sub> NO <sub>3</sub>                | 182.0812              | 136,123,119,95,91,27          |
| 15 | L-Methionin        | C <sub>5</sub> H <sub>11</sub> NO <sub>2</sub> S              | 150.0583              | 56, 61, 74, 87, 104, 115, 133 |
| 16 | L-Theamine         | C <sub>7</sub> H <sub>14</sub> N <sub>2</sub> O <sub>3</sub>  | 175.1077              | 158,129,84,56                 |

|                             |                                           |                      |          |                                                 |
|-----------------------------|-------------------------------------------|----------------------|----------|-------------------------------------------------|
| <b>Theaflavins</b>          |                                           |                      |          |                                                 |
| 17                          | Theaflavin                                | $C_{29}H_{24}O_{12}$ | 565.1341 | 427,277,139                                     |
| 18                          | Theaflavin-3-gallate                      | $C_{36}H_{28}O_{16}$ | 717.145  | 579,379,277,139                                 |
| 19                          | Theaflavin-3'-gallate                     | $C_{36}H_{28}O_{16}$ | 717.145  | 591,579,333,277,139                             |
| 20                          | Theaflavine-3,3'-digallate                | $C_{43}H_{32}O_{20}$ | 869.156  | 743,699,529,333,277,000                         |
| <b>Catechins</b>            |                                           |                      |          |                                                 |
| 21                          | (-)-gallocatechin/GC                      | $C_{15}H_{14}O_7$    | 307.0812 | 223,195,163,139,95                              |
| 22                          | (-)-Epigallocatechin/EGC                  | $C_{15}H_{14}O_7$    | 307.0812 | 223,195,163,139,95                              |
| 23                          | (+)-Catechin/C                            | $C_{15}H_{14}O_6$    | 291.0863 | 207,139,123,95,55                               |
| 24                          | Epigallocatechin gallate/EGCG             | $C_{22}H_{18}O_{11}$ | 459.0922 | 289,205,181,153,139,123,65                      |
| 25                          | Epicatechin /EC                           | $C_{15}H_{14}O_6$    | 291.0863 | 207,139,123,95,55                               |
| 26                          | (-)-Gallocatechin gallate/GCG             | $C_{22}H_{18}O_{11}$ | 459.0922 | 289,205,181,153,139,123,65                      |
| 27                          | (-)-Epicatechin gallate/ECG               | $C_{22}H_{18}O_{10}$ | 443.0973 | 291,273,207,153,139,77                          |
| 28                          | Catechin gallate/CG                       | $C_{22}H_{18}O_{10}$ | 443.0973 | 291,273,207,153,139,77                          |
| <b>Alkaloids</b>            |                                           |                      |          |                                                 |
| 29                          | Theobromine                               | $C_7H_8N_4O_2$       | 181.072  | 163,138,122,110,83,69,67,56                     |
| 30                          | Theophylline                              | $C_7H_8N_4O_2$       | 181.072  | 124,96,69                                       |
| 31                          | Caffeine                                  | $C_8H_{10}N_4O_2$    | 195.0877 | 138,123,110,83,69,56                            |
| <b>Flavonoid glycosides</b> |                                           |                      |          |                                                 |
| 32                          | (-)-Epiafzelechin                         | $C_{15}H_{14}O_5$    | 275.0914 | 257,233,191,163,149,139,121,107,95,55           |
| 33                          | Kaempferol                                | $C_{15}H_{10}O_6$    | 287.0550 | 153,69                                          |
| 34                          | Kaempferide                               | $C_{16}H_{12}O_6$    | 301.0707 | 286,258,230,153,69                              |
| 35                          | Quercetin                                 | $C_{15}H_{10}O_7$    | 303.0499 | 229,153,69                                      |
| 36                          | Myricetin                                 | $C_{15}H_{10}O_8$    | 319.0448 | 273,245,217,165,153,137,111,69                  |
| 37                          | Vitexin                                   | $C_{21}H_{20}O_{10}$ | 433.1129 | 415,397,367,313,283                             |
| 38                          | Isovitexin                                | $C_{21}H_{20}O_{10}$ | 433.1129 | 416,380,350,338,314,296,284,272,244.16<br>5,121 |
| 39                          | Quercitrin                                | $C_{21}H_{20}O_{11}$ | 449.1078 | 303,129,85,71,57                                |
| 40                          | Astragaline                               | $C_{21}H_{20}O_{11}$ | 449.1074 | 288,259,214,153,127,85                          |
| 41                          | Quercetin-7- O- $\alpha$ -L-rhamnoside    | $C_{21}H_{20}O_{11}$ | 449.1078 | 303,229,85                                      |
| 42                          | Quercetin-7-O- $\beta$ -D-glucopyranoside | $C_{21}H_{20}O_{12}$ | 465.1028 | 303                                             |
| 43                          | Hyperoside                                | $C_{21}H_{20}O_{12}$ | 465.1025 | 404,365,335,298,266,232,203,153,113,81          |
| 44                          | Myricetin 3-O-galactoside                 | $C_{21}H_{20}O_{13}$ | 481.0977 | 319,127,85,61                                   |
| 45                          | Isovitexin 2"-O-arabinoside               | $C_{26}H_{28}O_{14}$ | 565.1552 | 435,369,314,115,73                              |
| 46                          | Procyanidin B1                            | $C_{30}H_{26}O_{12}$ | 579.1497 | 513,451,411,374,330,289,260,164,127,90          |
| 47                          | Procyanidin B2                            | $C_{30}H_{26}O_{12}$ | 579.1497 | 537,411,287,247,205                             |

|    |                                             |                                                 |          |                                            |
|----|---------------------------------------------|-------------------------------------------------|----------|--------------------------------------------|
| 48 | Glucosyl-vitexin                            | C <sub>27</sub> H <sub>30</sub> O <sub>16</sub> | 611.1607 | 449,329,287,85                             |
| 49 | Quercetin-3-o-rutinoside                    | C <sub>27</sub> H <sub>30</sub> O <sub>16</sub> | 611.1607 | 449,329,287,85                             |
| 50 | Quercetin-3-O-D-glucosyl-(1-2)-L-rhamnoside | C <sub>27</sub> H <sub>30</sub> O <sub>16</sub> | 611.1607 | 449,431,413,369,345,303,129,85             |
|    | <b>Organic acids</b>                        |                                                 |          |                                            |
| 51 | Fumaric acid                                | C <sub>4</sub> H <sub>4</sub> O <sub>4</sub>    | 117.0182 | 99,75,71,59,58,53                          |
| 52 | $\alpha$ -Ketoglutaric acid                 | C <sub>5</sub> H <sub>6</sub> O <sub>5</sub>    | 147.0288 | 84                                         |
| 53 | Shikimic acid                               | C <sub>7</sub> H <sub>10</sub> O <sub>5</sub>   | 175.0601 | 158,84,56                                  |
| 54 | Caffeic acid                                | C <sub>9</sub> H <sub>8</sub> O <sub>4</sub>    | 181.0495 | 163,145,135,117,107,89,79                  |
| 55 | Chlorogenic acid                            | C <sub>16</sub> H <sub>18</sub> O <sub>9</sub>  | 355.1042 | 163,145,135,117,89                         |
| 56 | Gallic acid                                 | C <sub>7</sub> H <sub>6</sub> O <sub>5</sub>    | 171.0288 | 153,135,127,125,109,107,81,53              |
|    | <b>GVBs</b>                                 |                                                 |          |                                            |
| 57 | (Z)-3-hexenyl $\beta$ -D-glucoside          | C <sub>12</sub> H <sub>22</sub> O <sub>6</sub>  | 285.1309 | 268,235,211,179,153,129,105,92             |
| 58 | Benzyl $\beta$ -D-glucoside                 | C <sub>13</sub> H <sub>18</sub> O <sub>6</sub>  | 293.0996 | 265,234,205,184,169,143,129,117            |
| 59 | 2-Phenylethyl $\beta$ -D-glucoside          | C <sub>14</sub> H <sub>20</sub> O <sub>6</sub>  | 307.1152 | 292,266,232,215,201,185,165,144,126,102,85 |
| 60 | Geranyl $\beta$ -D-glucoside                | C <sub>16</sub> H <sub>28</sub> O <sub>6</sub>  | 339.1778 | 301,262,236,203,179,164,117                |
| 61 | Nerol $\beta$ -D-glucoside                  | C <sub>16</sub> H <sub>28</sub> O <sub>6</sub>  | 339.1778 | 292,267,237,220,203,168,143,121,96,81      |
| 62 | Benzyl $\beta$ -D-primeveroside             | C <sub>18</sub> H <sub>26</sub> O <sub>10</sub> | 425.1418 | 404,330,293,231,200,150,119,95             |
| 63 | 2-Phenylethyl $\beta$ -D-primeveroside      | C <sub>19</sub> H <sub>28</sub> O <sub>10</sub> | 439.1575 | 401,307,275,218,170,123                    |
| 64 | Geranyl $\beta$ -D-primeveroside            | C <sub>21</sub> H <sub>36</sub> O <sub>10</sub> | 471.2201 | 335,275,245,203,169,123                    |
| 65 | Nerol $\beta$ -D-primeveroside              | C <sub>21</sub> H <sub>36</sub> O <sub>10</sub> | 471.2201 | 426,381,335,275,203,173,141,105,77         |

**Table S5. Relative content of non-volatile compounds of black tea with different degrees of sun withering (mg/g).**

| NO | Compounds          | CK            | S72            | S69            | S66            | S63           | S60           |
|----|--------------------|---------------|----------------|----------------|----------------|---------------|---------------|
|    | <b>Amino acids</b> |               |                |                |                |               |               |
| 1  | L-Glutamine        | 0.3212±0.012b | 0.3232±0.009b  | 0.3305±0.004b  | 0.3325±0.001b  | 0.3223±0.003b | 0.3562±0.012a |
| 2  | L-Lysine           | 0.0711±0.003b | 0.0627±0.001c  | 0.066±0.001c   | 0.0716±0.001b  | 0.0637±0.001c | 0.0804±0.003a |
| 3  | L-Arginine         | 1.2863±0.092d | 1.6349±0.13c   | 2.6615±0.211a  | 2.3806±0.122ab | 2.2082±0.27b  | 2.3066±0.027b |
| 4  | L-Isoleucine       | 0.3766±0.021a | 0.2245±0.015c  | 0.2005±0.004d  | 0.2607±0.016b  | 0.2333±0.01c  | 0.2712±0.007b |
| 5  | L-Leucine          | 2.1676±0.029a | 1.5694±0.036e  | 1.5902±0.022de | 1.7061±0.025c  | 1.6321±0.005d | 2.0802±0.016b |
| 6  | L-Phenylalanine    | 3.2465±0.12a  | 0.8879±0.011b  | 0.8962±0.011b  | 0.7097±0.014c  | 0.5037±0.006d | 0.4927±0.007d |
| 7  | L-Tryptophan       | 0.5638±0.026a | 0.3845±0.012c  | 0.3827±0c      | 0.3851±0.004c  | 0.3656±0.004c | 0.4244±0.017b |
| 8  | L-Aspartic acid    | 0.008±0b      | 0.0047±0e      | 0.0053±0d      | 0.0061±0c      | 0.0058±0c     | 0.0096±0a     |
| 9  | L-Asparagine       | 0.1471±0.008a | 0.1062±0.003cd | 0.0991±0.004d  | 0.1099±0.002c  | 0.1128±0c     | 0.1364±0.003b |

|    |                               |                |                |                 |                 |                |                |
|----|-------------------------------|----------------|----------------|-----------------|-----------------|----------------|----------------|
| 10 | L-Glutamic acid               | 0.0335±0.001d  | 0.035±0.001c   | 0.0363±0b       | 0.0364±0.001b   | 0.0333±0d      | 0.0395±0a      |
| 11 | L-Threonine                   | 0.3214±0.027a  | 0.0943±0.007b  | 0.0903±0.002bc  | 0.0736±0.003cd  | 0.0576±0.002d  | 0.0536±0.004d  |
| 12 | L-Proline                     | 0.023±0.001d   | 0.0265±0b      | 0.0267±0.001b   | 0.028±0a        | 0.0253±0.001c  | 0.0276±0.001ab |
| 13 | L-Valine                      | 0.2022±0.002d  | 0.2192±0.008bc | 0.2134±0.01c    | 0.2315±0.002a   | 0.2289±0.003ab | 0.1495±0.006e  |
| 14 | L-Tyrosine                    | 0.332±0.011a   | 0.3022±0.006d  | 0.3064±0.008cd  | 0.3158±0.007bc  | 0.2987±0.005d  | 0.3287±0.007ab |
| 15 | L-Methionin                   | 0.0004±0d      | 0.0006±0b      | 0.0006±0b       | 0.0009±0a       | 0.0004±0d      | 0.0005±0c      |
| 16 | L-Theanine                    | 8.7002±0.276c  | 8.7094±0.066c  | 9.0963±0.128b   | 9.0531±0.144b   | 8.4244±0.08d   | 9.5482±0.077a  |
|    | <b>Total</b>                  | 17.8009±0.437a | 14.5849±0.137d | 16.002±0.356bc  | 15.7018±0.305c  | 14.5161±0.344d | 16.3053±0.079b |
|    | <b>Theaflavins</b>            |                |                |                 |                 |                |                |
| 17 | Theaflavin                    | 0.1734±0.003f  | 0.253±0.003b   | 0.2763±0.003a   | 0.2439±0.003c   | 0.2185±0.001d  | 0.2112±0.003e  |
| 18 | Theaflavin-3-gallate          | 0.1537±0.004d  | 0.1933±0.001b  | 0.2114±0.002a   | 0.1955±0.003b   | 0.1743±0.001c  | 0.1769±0.003c  |
| 19 | Theaflavin-3'-gallate         | 0.1218±0.004d  | 0.1679±0.004b  | 0.1905±0.002a   | 0.1729±0.005b   | 0.149±0.001c   | 0.1559±0.006c  |
| 20 | Theaflavine-3,3'-digallate    | 0.1539±0.005e  | 0.1791±0.001c  | 0.1916±0.002a   | 0.1898±0.002ab  | 0.1727±0.001d  | 0.1867±0.003b  |
|    | <b>Total</b>                  | 0.6028±0.013d  | 0.7933±0.002b  | 0.8698±0.007a   | 0.802±0.013b    | 0.7146±0.003c  | 0.7307±0.014c  |
|    | <b>Catechins</b>              |                |                |                 |                 |                |                |
| 21 | (-)-gallocatechin/GC          | 0.0321±0.001e  | 0.074±0.004b   | 0.0989±0.001a   | 0.0674±0.002c   | 0.0471±0.001d  | 0.0328±0.001e  |
| 22 | (-)-Epigallocatechin/EGC      | 0.0538±0.003f  | 0.1166±0.003b  | 0.1552±0.003a   | 0.1089±0.003c   | 0.0793±0.002d  | 0.0606±0.001e  |
| 23 | (+)-Catechin/C                | 0.0934±0.004e  | 0.1873±0.003b  | 0.2237±0.004a   | 0.1498±0.007c   | 0.1286±0.001d  | 0.0956±0.004e  |
| 24 | Epigallocatechin gallate/EGCG | 0.0771±0.004e  | 0.1702±0.008b  | 0.2126±0.009a   | 0.1373±0.006c   | 0.115±0.003d   | 0.0598±0.002f  |
| 25 | Epicatechin /EC               | 0.1502±0.011e  | 0.2993±0.013b  | 0.3588±0.001a   | 0.2456±0.006c   | 0.2049±0.001d  | 0.1633±0.003e  |
| 26 | (-)-Gallocatechin gallate/GCG | 0.1307±0.001e  | 0.2836±0.01b   | 0.3536±0.012a   | 0.2244±0.01c    | 0.1879±0.001d  | 0.111±0.005f   |
| 27 | (-)-Epicatechin gallate/ECG   | 0.1561±0.003e  | 0.279±0.006b   | 0.3238±0.003a   | 0.2198±0.007c   | 0.1897±0.001d  | 0.1191±0.005f  |
| 28 | Catechin gallate/CG           | 0.1561±0.003e  | 0.279±0.006b   | 0.3238±0.003a   | 0.2198±0.007c   | 0.1897±0.001d  | 0.1191±0.005f  |
|    | <b>Total</b>                  | 0.8496±0.022e  | 1.6889±0.039b  | 2.0504±0.023a   | 1.3729±0.041c   | 1.1421±0.004d  | 0.7612±0.014f  |
|    | <b>Alkaloids</b>              |                |                |                 |                 |                |                |
| 29 | Theobromine                   | 0.2058±0.003d  | 0.3129±0.001c  | 0.3196±0.005bc  | 0.3343±0.005ab  | 0.3253±0.011c  | 0.3536±0.025a  |
| 30 | Theophylline                  | 0.3202±0.009e  | 0.4817±0.011d  | 0.5122±0.012c   | 0.5592±0.011b   | 0.5471±0.009b  | 0.6497±0.015a  |
| 31 | Caffeine                      | 22.9411±0.302b | 22.5237±0.119b | 22.7139±0.164b  | 22.8528±0.073b  | 21.9175±0.087c | 23.4493±0.459a |
|    | <b>Total</b>                  | 23.4671±0.296b | 23.3184±0.131b | 23.5458±0.171b  | 23.7463±0.062b  | 22.7898±0.083c | 24.4526±0.494a |
|    | <b>Flavonoid glycosides</b>   |                |                |                 |                 |                |                |
| 32 | (-)-Epiafzelechin             | 1.1904±0.027e  | 1.4305±0.01c   | 1.4556±0.005c   | 1.5132±0.015b   | 1.3198±0.009d  | 1.6296±0.02a   |
| 33 | Kaempferol                    | 0.0415±0.001a  | 0.0378±0.001c  | 0.0388±0b       | 0.0392±0b       | 0.0394±0b      | 0.0386±0.001bc |
| 34 | Kaempferide                   | 0.6603±0.03d   | 0.8655±0.027c  | 1.0831±0.1b     | 1.2026±0.02a    | 0.536±0.028e   | 0.6256±0.022d  |
| 35 | Quercetin                     | 0.2246±0.006bc | 0.2404±0a      | 0.2247±0.001bc  | 0.2303±0.005b   | 0.2204±0.003c  | 0.2269±0.003b  |
| 36 | Myricetin                     | 0.2104±0.006bc | 0.2268±0.012a  | 0.2173±0.005abc | 0.2178±0.007abc | 0.2101±0.005c  | 0.2224±0.004ab |



|    |                                             |                |                |                |                |                |                |
|----|---------------------------------------------|----------------|----------------|----------------|----------------|----------------|----------------|
| 37 | Vitexin                                     | 0.0083±0d      | 0.0096±0b      | 0.0094±0b      | 0.0096±0b      | 0.0101±0a      | 0.0088±0c      |
| 38 | Isovitexin                                  | 0.0076±0b      | 0.0089±0a      | 0.0088±0a      | 0.0091±0a      | 0.0092±0a      | 0.0075±0b      |
| 39 | Quercitrin                                  | 0.0617±0.002bc | 0.0617±0.002bc | 0.0616±0.001bc | 0.0631±0.001b  | 0.0595±0.001c  | 0.0667±0.001a  |
| 40 | Astragaline                                 | 0.4485±0.004c  | 0.4515±0.007c  | 0.4552±0.006bc | 0.4636±0.001b  | 0.4355±0.008d  | 0.4858±0.004a  |
| 41 | Quercetin-7- O- $\alpha$ -L-rhamnoside      | 0.3282±0.002cd | 0.335±0.005bc  | 0.3372±0.004b  | 0.3407±0.002b  | 0.3249±0.005d  | 0.3564±0.003a  |
| 42 | Quercetin-7-O- $\beta$ -D-glucopyranoside   | 0.0897±0.001e  | 0.1017±0.002b  | 0.106±0.001a   | 0.101±0.001bc  | 0.0973±0d      | 0.0992±0.001cd |
| 43 | Hyperoside                                  | 0.0862±0.001e  | 0.1034±0.001b  | 0.1058±0.002a  | 0.0965±0.001c  | 0.0977±0.002c  | 0.0935±0d      |
| 44 | Myricetin 3-O-galactoside                   | 0.0092±0.001b  | 0.008±0c       | 0.0089±0b      | 0.0079±0.001c  | 0.0077±0c      | 0.0103±0a      |
| 45 | Isovitexin 2"-O-arabinoside                 | 0.1734±0.003f  | 0.253±0.003b   | 0.2768±0.003a  | 0.2439±0.003c  | 0.2185±0.001d  | 0.2112±0.003e  |
| 46 | Procyanidin B1                              | 0.0831±0.003c  | 0.1019±0.005b  | 0.1161±0.001a  | 0.1053±0.002b  | 0.0414±0.002d  | 0.0306±0.001e  |
| 47 | Procyanidin B2                              | 0.4193±0.024d  | 0.5335±0.021c  | 0.8447±0.053b  | 0.8978±0.023a  | 0.3524±0e      | 0.3303±0.021e  |
| 48 | Glucosyl-vitexin                            | 0.0377±0e      | 0.0476±0.001b  | 0.0494±0a      | 0.0432±0.001c  | 0.0442±0.001c  | 0.0407±0d      |
| 49 | Quercetin-3-o-rutinoside                    | 0.0421±0.001e  | 0.0525±0.001b  | 0.0542±0a      | 0.048±0.001c   | 0.0483±0c      | 0.0455±0d      |
| 50 | Quercetin-3-O-D-glucosyl-(1-2)-L-rhamnoside | 0.002±0c       | 0.0021±0bc     | 0.002±0bc      | 0.0022±0ab     | 0.0022±0a      | 0.0021±0abc    |
|    | <b>Total</b>                                | 4.1242±0.066e  | 4.8716±0.029c  | 5.4555±0.113b  | 5.635±0.028a   | 4.0747±0.036e  | 4.5318±0.05d   |
|    | <b>Organic acids</b>                        |                |                |                |                |                |                |
| 51 | Fumaric acid                                | 0.0199±0.001d  | 0.0216±0bc     | 0.0226±0.001ab | 0.0235±0.001a  | 0.0209±0.001cd | 0.0237±0.001a  |
| 52 | $\alpha$ -Ketoglutaric acid                 | 0.3302±0.005b  | 0.3238±0.009b  | 0.3274±0.009b  | 0.3308±0.004b  | 0.3284±0.005b  | 0.3648±0.004a  |
| 53 | Shikimic acid                               | 8.7002±0.276c  | 8.7094±0.066c  | 9.1002±0.131b  | 9.103±0.078b   | 8.4287±0.081d  | 9.5482±0.077a  |
| 54 | Caffeic acid                                | 0.3188±0.01e   | 0.4817±0.011d  | 0.5122±0.012c  | 0.5591±0.011b  | 0.5471±0.009b  | 0.9968±0.02a   |
| 55 | Chlorogenic acid                            | 0.1566±0.001a  | 0.1557±0.001a  | 0.1556±0.001a  | 0.1475±0.001b  | 0.1426±0c      | 0.1356±0.002d  |
| 56 | Gallic acid                                 | 0.0392±0e      | 0.062±0.001b   | 0.0692±0.001a  | 0.0626±0.002b  | 0.0586±0c      | 0.0564±0d      |
|    | <b>Total</b>                                | 9.5649±0.26c   | 9.7542±0.081c  | 10.1871±0.123b | 10.2264±0.072b | 9.5261±0.078c  | 11.1256±0.103a |
|    | <b>GVBs</b>                                 |                |                |                |                |                |                |
| 57 | (Z)-3-hexenyl $\beta$ -D-glucoside          | 0.0638±0.003d  | 0.077±0.005c   | 0.0688±0.003d  | 0.1054±0.002b  | 0.1171±0.005a  | 0.1171±0.005a  |
| 58 | Benzyl $\beta$ -D-glucoside                 | 0.0376±0.001d  | 0.0549±0.001b  | 0.0581±0.001a  | 0.0571±0a      | 0.0511±0.001c  | 0.0526±0.001c  |
| 59 | 2-Phenylethyl $\beta$ -D-glucoside          | 0.0584±0.004d  | 0.1166±0.003b  | 0.1586±0.005a  | 0.1079±0.004c  | 0.0601±0.001d  | 0.0601±0.001d  |
| 60 | Geranyl $\beta$ -D-glucoside                | 0.297±0.005b   | 0.2933±0.006b  | 0.2991±0.003b  | 0.2968±0.001b  | 0.3277±0.004a  | 0.3277±0.004a  |
| 61 | Nerol $\beta$ -D-glucoside                  | 0.1491±0.013d  | 0.2±0.001c     | 0.2085±0.012c  | 0.2447±0.01b   | 0.2827±0.005a  | 0.2827±0.005a  |
| 62 | Benzyl $\beta$ -D-primeveroside             | 0.0023±0c      | 0.0033±0a      | 0.0019±0d      | 0.003±0b       | 0.0015±0e      | 0.0015±0e      |
| 63 | 2-Phenylethyl $\beta$ -D-primeveroside      | 0.0601±0.001d  | 0.1016±0.002b  | 0.109±0.002a   | 0.0932±0.002c  | 0.0568±0.001e  | 0.0568±0.001e  |
| 64 | Geranyl $\beta$ -D-primeveroside            | 0.2473±0.003b  | 0.2547±0.003a  | 0.2554±0.006a  | 0.2537±0.001a  | 0.2526±0.002ab | 0.2506±0.002ab |
| 65 | Nerol $\beta$ -D-primeveroside              | 0.1617±0.001b  | 0.1659±0.003a  | 0.1655±0.003a  | 0.1636±0.001ab | 0.1645±0.001ab | 0.1552±0.002c  |
|    | <b>Total</b>                                | 1.0773±0.014c  | 1.2675±0.006b  | 1.3249±0.024a  | 1.3254±0.004a  | 1.3141±0.007a  | 1.3042±0.009a  |
|    | <b>All total</b>                            | 57.198±0.963b  | 56.2788±0.308b | 59.4356±0.221a | 58.8098±0.371a | 54.0578±0.408c | 59.2113±0.739a |

**Table S6. Correlation analysis between non-volatile components and sensory evaluation of black tea with different degrees of sun withering.**

| NO                 | Compounds                     | Taste score | Total score |
|--------------------|-------------------------------|-------------|-------------|
| <b>Amino acids</b> |                               |             |             |
| 1                  | L-Glutamine                   | 0.058       | 0.030       |
| 2                  | L-Lysine                      | -0.176      | -0.225      |
| 3                  | L-Arginine                    | 0.863**     | 0.843**     |
| 4                  | L-Isoleucine                  | -0.692**    | -0.694**    |
| 5                  | L-Leucine                     | -0.645**    | -0.672**    |
| 6                  | L-Phenylalanine               | -0.640**    | -0.611**    |
| 7                  | L-Tryptophan                  | -0.713**    | -0.705**    |
| 8                  | L-Aspartic acid               | -0.428      | -0.477*     |
| 9                  | L-Asparagine                  | -0.723**    | -0.752**    |
| 10                 | L-Glutamic acid               | 0.188       | 0.158       |
| 11                 | L-Threonine                   | -0.644**    | -0.617**    |
| 12                 | L-Proline                     | 0.563*      | 0.549*      |
| 13                 | L-Valine                      | 0.389       | 0.437       |
| 14                 | L-Tyrosine                    | 0.650**     | 0.632**     |
| 15                 | L-Methionine                  | 0.484*      | 0.523*      |
| 16                 | L-Theanine                    | 0.141       | 0.120       |
| <b>Theaflavins</b> |                               |             |             |
| 17                 | Theaflavin                    | 0.707**     | 0.737**     |
| 18                 | Theaflavin-3-gallate          | 0.739**     | 0.766**     |
| 19                 | Theaflavin-3'-gallate         | 0.762**     | 0.779**     |
| 20                 | Theaflavine-3,3'-digallate    | 0.615**     | 0.609**     |
| <b>Catechins</b>   |                               |             |             |
| 21                 | (-)-gallocatechin/GC          | 0.644**     | 0.691**     |
| 22                 | (-)-Epigallocatechin/EGC      | 0.665**     | 0.711**     |
| 23                 | (+)-Catechin/C                | 0.564*      | 0.611**     |
| 24                 | Epigallocatechin gallate/EGCG | 0.578*      | 0.628**     |
| 25                 | Epicatechin /EC               | 0.579*      | 0.626**     |
| 26                 | (-)-Gallocatechin gallate/GCG | 0.570*      | 0.617**     |
| 27                 | (-)-Epicatechin gallate/ECG   | 0.498*      | 0.551*      |
| 28                 | Catechin gallate/CG           | 0.498*      | 0.551*      |
| <b>Alkaloids</b>   |                               |             |             |

|    |                                             |         |         |
|----|---------------------------------------------|---------|---------|
| 29 | Theobromine                                 | 0.621** | 0.586*  |
| 30 | Theophylline                                | 0.523*  | 0.476*  |
| 31 | Caffeine                                    | -0.248  | -0.259  |
|    | <b>Flavonoid glycosides</b>                 |         |         |
| 32 | (-)-Epiafzelechin                           | 0.391   | 0.371   |
| 33 | Kaempferol                                  | -0.305  | -0.314  |
| 34 | Kaempferide                                 | 0.566*  | 0.624** |
| 35 | Quercetin                                   | -0.258  | -0.207  |
| 36 | Myricetin                                   | -0.078  | -0.051  |
| 37 | Vitexin                                     | 0.622** | 0.625** |
| 38 | Isovitexin                                  | 0.675** | 0.694** |
| 39 | Quercitrin                                  | -0.106  | -0.139  |
| 40 | Astragaline                                 | -0.012  | -0.045  |
| 41 | Quercetin-7- O- $\alpha$ -L-rhamnoside      | 0.075   | 0.040   |
| 42 | Quercetin-7-O- $\beta$ -D-glucopyranoside   | 0.713** | 0.722** |
| 43 | Hyperoside                                  | 0.606** | 0.624** |
| 44 | Myricetin 3-O-galactoside                   | -0.302  | -0.342  |
| 45 | Isovitexin 2"-O-arabinoside                 | 0.707** | 0.737** |
| 46 | Procyanidin B1                              | 0.252   | 0.328   |
| 47 | Procyanidin B2                              | 0.664** | 0.718** |
| 48 | Glucosyl-vitexin                            | 0.601** | 0.625** |
| 49 | Quercetin-3-o-rutinose                      | 0.583*  | 0.608** |
| 50 | Quercetin-3-O-D-glucosyl-(1-2)-L-rhamnoside | 0.374   | 0.358   |
|    | <b>Organic acids</b>                        |         |         |
| 51 | Fumaric acid                                | 0.468*  | 0.445   |
| 52 | $\alpha$ -Ketoglutaric acid                 | -0.154  | -0.208  |
| 53 | Shikimic acid                               | 0.162   | 0.143   |
| 54 | Caffeic acid                                | 0.131   | 0.073   |
| 55 | Chlorogenic acid                            | -0.152  | -0.082  |
| 56 | Gallic acid                                 | 0.795** | 0.804** |
|    | <b>GVBs</b>                                 |         |         |
| 57 | (Z)-3-hexenyl $\beta$ -D-glucoside          | 0.291   | 0.234   |
| 58 | Benzyl $\beta$ -D-glucoside                 | 0.760** | 0.765** |
| 59 | 2-Phenylethyl $\beta$ -D-glucoside          | 0.564*  | 0.615** |

|    |                                        |        |        |
|----|----------------------------------------|--------|--------|
| 60 | Geranyl $\beta$ -D-glucoside           | 0.095  | 0.013  |
| 61 | Nerol $\beta$ -D-glucoside             | 0.463  | 0.405  |
| 62 | Benzyl $\beta$ -D-primeveroside        | -0.173 | -0.102 |
| 63 | 2-Phenylethyl $\beta$ -D-primeveroside | 0.449  | 0.511* |
| 64 | Geranyl $\beta$ -D-primeveroside       | 0.562* | 0.571* |
| 65 | Nerol $\beta$ -D-primeveroside         | 0.327  | 0.374  |

**Table S7. Analysis results of the main physicochemical components of black tea with different degrees of sun withering (%).**

| Withering degree | Tea Polyphenols   | Free amino acids | Soluble sugars   | Theaflavins      | Thearubins        | Theabrownins     |
|------------------|-------------------|------------------|------------------|------------------|-------------------|------------------|
| CK               | 10.14 $\pm$ 0.09c | 1.76 $\pm$ 0.03b | 3.00 $\pm$ 0.03b | 0.34 $\pm$ 0.04c | 5.29 $\pm$ 0.03c  | 7.96 $\pm$ 0.03a |
| S72              | 11.34 $\pm$ 0.09a | 1.83 $\pm$ 0.02a | 2.97 $\pm$ 0.02b | 0.44 $\pm$ 0.01b | 5.86 $\pm$ 0.06ab | 7.39 $\pm$ 0.02d |
| S69              | 11.34 $\pm$ 0.09a | 1.83 $\pm$ 0.03a | 2.99 $\pm$ 0.05b | 0.52 $\pm$ 0.03a | 6.01 $\pm$ 0.13a  | 7.19 $\pm$ 0.02e |
| S66              | 11.33 $\pm$ 0.15a | 1.84 $\pm$ 0.03a | 2.99 $\pm$ 0.01b | 0.50 $\pm$ 0.02a | 5.94 $\pm$ 0.07a  | 7.69 $\pm$ 0.04c |
| S63              | 11.07 $\pm$ 0.05b | 1.83 $\pm$ 0.04a | 2.98 $\pm$ 0.04b | 0.45 $\pm$ 0.01b | 5.91 $\pm$ 0.07a  | 7.64 $\pm$ 0.09c |
| S60              | 11.03 $\pm$ 0.07b | 1.85 $\pm$ 0.05a | 3.07 $\pm$ 0.01a | 0.35 $\pm$ 0.03c | 5.72 $\pm$ 0.15b  | 7.82 $\pm$ 0.07b |

**Table S8. Relative content of volatile compounds in black tea with different degrees of sun withering (ug/g).**

| NO.             | Compound name                 | CAS        | Odor              | CK                   | S72                  | S69                 | S66                  | S63                  | S60                  |
|-----------------|-------------------------------|------------|-------------------|----------------------|----------------------|---------------------|----------------------|----------------------|----------------------|
| <b>Alcohols</b> |                               |            |                   |                      |                      |                     |                      |                      |                      |
| 1               | Benzyl alcohol                | 100-51-6   | boiled, cherries  | 23.316 $\pm$ 2.345a  | 21.743 $\pm$ 0.307a  | 23.697 $\pm$ 1.032a | 23.861 $\pm$ 0.603a  | 22.806 $\pm$ 1.194a  | 22.492 $\pm$ 1.86a   |
| 2               | (Z)-linalool oxide (furanoid) | 5989-33-3  | floral            | 23.687 $\pm$ 1.44d   | 24.428 $\pm$ 1.385d  | 30.463 $\pm$ 0.04a  | 27.485 $\pm$ 0.882b  | 26.414 $\pm$ 0.738cb | 25.138 $\pm$ 0.582cd |
| 3               | (E)-linalool oxide (furanoid) | 34995-77-2 | floral            | 33.578 $\pm$ 2.446bc | 30.638 $\pm$ 2.808c  | 36.97 $\pm$ 2.336a  | 35.676 $\pm$ 0.399ab | 33.609 $\pm$ 0.074bc | 32.142 $\pm$ 0.797c  |
| 4               | Linalool                      | 78-70-6    | coriander, floral | 35.702 $\pm$ 1.901bc | 35.925 $\pm$ 1.524bc | 42.147 $\pm$ 3.671a | 39.732 $\pm$ 1.186ab | 42.051 $\pm$ 4.301a  | 33.811 $\pm$ 3.014c  |
| 5               | Dehydrolinalool               | 29957-43-5 | mouldy            | 26.698 $\pm$ 1.6c    | 30.677 $\pm$ 2.458b  | 35.269 $\pm$ 1.952a | 33.216 $\pm$ 0.329ab | 32.468 $\pm$ 1.519ab | 25.806 $\pm$ 0.544c  |

|    |                                     |            |                         |                |                |                |                |                |               |
|----|-------------------------------------|------------|-------------------------|----------------|----------------|----------------|----------------|----------------|---------------|
| 6  | Benzeneethanol                      | 60-12-8    | fruit, honey            | 22.586±1.027c  | 31.886±0.295b  | 34.212±0.312a  | 32.367±0.259b  | 30.219±1.587c  | 26.794±0.27d  |
| 7  | (E)-linalool oxide (pyranoid)       | 39028-58-5 | woody, fresh            | 24.96±1.52a    | 18.695±1.675   | 20.368±3.251   | 20.24±2.116    | 19.679±2.599   | 19.478±0.152  |
| 8  | (Z)-linalool oxide (pyranoid)       | 14009-71-3 | citrus, green           | 38.089±1.863a  | 32.945±3.518b  | 36.735±4.465ab | 39.975±1.052a  | 35.517±4.771ab | 33.879±0.632b |
| 9  | $\alpha$ -Terpineol                 | 10482-56-1 | lilac, floral           | 0.824±0.045a   | 0.623±0.012c   | 0.626±0.009c   | 0.726±0.063b   | 0.692±0.004b   | 0.572±0.019c  |
| 10 | Nopol                               | 128-50-7   | sweet, balsamic         | 2.276±0.049c   | 2.182±0.146c   | 2.502±0.118b   | 2.233±0.136c   | 2.812±0.081a   | 2.279±0.115c  |
| 11 | Nerol                               | 106-25-2   | floral, fruit           | 7.709±0.585a   | 6.609±0.493b   | 6.387±0.172b   | 6.405±0.279b   | 6.313±0.238b   | 5.043±0.504c  |
| 12 | Geraniol                            | 106-24-1   | geranium, lemon, peel   | 72.019±1.221ab | 73.085±2.101ab | 76.194±4.477a  | 71.301±1.854bc | 70.24±0.667bc  | 66.547±3.707c |
| 13 | Cuminol                             | 536-60-7   | herb, wood              | 2.668±0.181a   | 1.738±0.275b   | 1.667±0.043b   | 1.237±0.059c   | 1.368±0.139bc  | 1.142±0.125c  |
| 14 | 2-Hexyl-1-decanol                   | 2425-77-6  | null                    | 0±0d           | 0±0d           | 0±0d           | 0.102±0.024c   | 0.191±0.014b   | 0.227±0.028a  |
| 15 | 3,7,11-trimethyldodecan-1-ol        | 6750-34-1  | null                    | 0.429±0.019a   | 0.301±0.027c   | 0.456±0.018a   | 0.448±0.014a   | 0.371±0.031b   | 0.38±0.008b   |
| 16 | Nerolidol                           | 40716-66-3 | floral, green, citrus   | 9.796±0.195a   | 5.235±0.176c   | 7.466±0.233b   | 4.003±0.243d   | 4.016±0.132d   | 3.561±0.073c  |
| 17 | 2,6-dimethyl-3,7-octadien-2,6-diol  | 51276-34-7 | null                    | 0±0b           | 0±0b           | 0±0b           | 0±0b           | 0±0b           | 1.145±0.027a  |
| 18 | 2,6-dimethylocta-1,7-diene-3,6-diol | 51276-33-6 | null                    | 2.925±0.321a   | 2.252±0.235bc  | 2.485±0.363abc | 2.688±0.335ab  | 2.095±0.135c   | 0±0d          |
| 19 | (E)-para-2,8-Menthadien-1-ol        | 7212-40-0  | fresh, minty            | 0.56±0.013a    | 0.421±0.016c   | 0.486±0.013b   | 0.406±0.003c   | 0.335±0.01d    | 0.266±0.003c  |
| 20 | (E)-para-2-menthen-1-ol             | 29803-81-4 | null                    | 0±0c           | 0.818±0.029a   | 0.941±0.11a    | 0.76±0.07b     | 0.667±0.014c   | 0.619±0.021d  |
| 21 | Laevo-pinocarveol                   | 547-61-5   | woody, balsamic, fennel | 0±0c           | 0.227±0.032b   | 0.371±0.046a   | 0±0c           | 0±0c           | 0±0c          |
| 22 | (Z)-verbenol                        | 1845-30-3  | null                    | 0±0c           | 1.188±0.082a   | 1.018±0.067b   | 0±0c           | 0±0c           | 0±0c          |
| 23 | (E,Z)-3,6-Nonadien-1-ol             | 56805-23-3 | green, cucumber         | 0.541±0.034a   | 0.47±0.021bc   | 0.466±0.009bc  | 0.507±0.034ab  | 0.444±0.028c   | 0.424±0.038c  |
| 24 | Dihydrocarveol                      | 38049-26-2 | null                    | 0.985±0.051b   | 1.276±0.009a   | 0.775±0.011c   | 0.683±0.017d   | 0.663±0.04d    | 0.395±0.003c  |
| 25 | $\alpha$ -cadinol                   | 481-34-5   | herb, wood              | 0.359±0.017a   | 0.224±0.007d   | 0.274±0.003b   | 0.256±0.011c   | 0.165±0.009c   | 0.179±0.016c  |

|    |                                               |            |                            |               |               |              |               |              |               |
|----|-----------------------------------------------|------------|----------------------------|---------------|---------------|--------------|---------------|--------------|---------------|
| 26 | Myrtenol                                      | 19894-97-4 | woody, pine, balsam        | 0±0b          | 0±0b          | 0±0b         | 0±0b          | 0±0b         | 0.073±0.002a  |
| 27 | 3-methyl-3-buten-2-ol                         | 10473-14-0 | null                       | 0.136±0.015a  | 0.135±0.003a  | 0.136±0.01a  | 0.088±0.008b  | 0.073±0.002c | 0.059±0.006d  |
| 28 | Cis-2-penten-1-ol                             | 1576-95-0  | green, ethereal, medicinal | 0.405±0.033b  | 0.369±0.01c   | 0.427±0.03ab | 0.515±0.071a  | 0.406±0.019b | 0.252±0.039d  |
| 29 | 2-Hexanol                                     | 626-93-7   | winey, fruity, fatty       | 0.029±0c      | 0.129±0.011a  | 0.112±0.008a | 0.115±0.017a  | 0.034±0.005c | 0.052±0b      |
| 30 | 2,3-dimethylpentan-1-ol                       | 10143-23-4 | null                       | 0.581±0.015bc | 0.637±0.001ab | 0.679±0.038a | 0.632±0.075ab | 0.531±0.056c | 0.218±0.003d  |
| 31 | 2,3-dimethylbutan-1-ol                        | 19550-30-2 | null                       | 1.482±0.097c  | 2.121±0.262a  | 1.683±0.032b | 1.743±0.081b  | 0.192±0.016a | 0.166±0.009b  |
| 32 | 2,5-dimethyl-2-hexanol                        | 3730-60-7  | null                       | 1.461±0.141b  | 0.501±0.017c  | 2.294±1.698a | 0.163±0.008e  | 0.295±0.005d | 0.174±0.016e  |
| 33 | (Z)-hex-3-en-1-ol                             | 928-96-1   | grass, green, fruit        | 3.934±0.314b  | 4.848±0.186a  | 3.268±0.529b | 2.652±0.072c  | 2.575±0.143c | 2.152±0.179d  |
| 34 | Trans-2-Hexen-1-ol                            | 928-95-0   | fresh, green, fruity       | 0.233±0.003b  | 0.169±0.008c  | 0.223±0.008b | 0.287±0.036a  | 0.226±0.017b | 0.166±0.012c  |
| 35 | Hexanol                                       | 111-27-3   | banana, flower, grass      | 0.182±0.023cd | 0.166±0.001d  | 0.233±0.018b | 0.279±0.006a  | 0.288±0.015a | 0.199±0.026bc |
| 36 | 2-butoxyethanol                               | 111-76-2   | null                       | 0.131±0.011a  | 0.15±0.013a   | 0.085±0.006b | 0.061±0.004c  | 0.047±0.004d | 0.04±0.007d   |
| 37 | Trans-2,4-hexadien-1-ol                       | 111-28-4   | fruit                      | 0.028±0.002c  | 0.08±0.004a   | 0.046±0.002b | 0.041±0.001b  | 0.049±0.004b | 0.047±0.007b  |
| 38 | 1-Octene-3-ol                                 | 3391-86-4  | cucumber, earth, fat       | 0.062±0.001c  | 0.045±0.002d  | 0.049±0.004d | 0.067±0.003b  | 0.072±0.002b | 0.091±0.011a  |
| 39 | (Z)-para-2,8-menthadien-1-ol                  | 3886-78-0  | null                       | 0.101±0.001b  | 0.04±0e       | 0.08±0.001d  | 0.118±0.017a  | 0.123±0.003a | 0.09±0.002c   |
| 40 | Butyldiglycol                                 | 112-34-5   | null                       | 0.215±0.005c  | 0.217±0.012c  | 0.216±0.009c | 0.296±0.032b  | 0.328±0.018b | 0.426±0.03a   |
| 41 | (Z)-2-(3,3-Dimethylcyclohexylidene)ethanol    | 26532-23-0 | null                       | 0.073±0a      | 0.041±0c      | 0.042±0.001c | 0.073±0.001a  | 0.064±0.005b | 0.054±0.006b  |
| 42 | 4,6,6-trimethylbicyclo[3.1.1]heptane-3,4-diol | 53404-49-2 | null                       | 0.065±0.003c  | 0.037±0.002d  | 0.071±0.002b | 0.084±0.005a  | 0.08±0.002a  | 0.085±0.011a  |
| 43 | (E)-2-decen-1-ol                              | 18409-18-2 | fruit                      | 0.004±0d      | 0.001±0e      | 0.075±0.001a | 0.073±0.008a  | 0.051±0.001b | 0.034±0.004c  |
| 44 | 2-butyl-1-octanol                             | 3913-02-8  | null                       | 0.037±0.002d  | 0.15±0.017b   | 0.075±0.007c | 0.125±0.016b  | 0.126±0.012b | 0.333±0.024a  |
| 45 | 2-methyl undecanol                            | 10522-26-6 | balsam                     | 0.029±0.002c  | 0.021±0.001d  | 0.035±0.005c | 0.064±0.003b  | 0.068±0.001a | 0.06±0.004b   |

|           |                         |            |                              |               |                |               |               |               |                |
|-----------|-------------------------|------------|------------------------------|---------------|----------------|---------------|---------------|---------------|----------------|
| 46        | (+)-Cedrol              | 77-53-2    | cedarwood, woody, sweet      | 0.046±0.004b  | 0.035±0.004c   | 0.038±0.001c  | 0.037±0.006c  | 0.045±0.004b  | 0.089±0.006a   |
| 47        | Alpha-muurolol          | 19435-97-3 | herbal, honey                | 0.004±0e      | 0.008±0d       | 0.052±0.001b  | 0.008±0d      | 0.013±0c      | 0.059±0.003a   |
| 48        | 2-Hexadecanol           | 14852-31-4 | null                         | 0.02±0.001d   | 0.027±0.004c   | 0.033±0.001b  | 0.032±0.005bc | 0.033±0.001b  | 0.055±0.002a   |
| 49        | Farnesol                | 4602-84-0  | mild, fresh, sweet           | 0.001±0d      | 0.004±0c       | 0.004±0c      | 0.003±0c      | 0.027±0.002a  | 0.018±0.001b   |
| 50        | Octadecanol             | 112-92-5   | bland                        | 0.007±0d      | 0.009±0.001c   | 0.008±0c      | 0.007±0.001d  | 0.01±0b       | 0.076±0.006a   |
| Aldehydes |                         |            |                              |               |                |               |               |               |                |
| 51        | Benzaldehyde            | 100-52-7   | bitter, almond, burnt, sugar | 2.476±0.008a  | 0.779±0.049d   | 0.706±0.015e  | 0.941±0.019c  | 1.117±0.083b  | 0.827±0.004d   |
| 52        | Octanal                 | 124-13-0   | citrus, fat, green, oil      | 0.248±0.021e  | 0.493±0.02d    | 1.668±0.048b  | 1.67±0.06b    | 1.815±0.114a  | 0.598±0.009c   |
| 53        | Benzeneacetaldehyde     | 122-78-1   | berry, geranium, honey       | 22.94±1.622a  | 17.264±0.954b  | 17.634±1.613b | 17.076±1.544b | 17.876±0.637b | 14.238±0.848c  |
| 54        | (2E,6Z)-nona-2,6-dienal | 557-48-2   | cucumber, green, wax         | 2.6±0.039a    | 1.188±0.082b   | 1.102±0.015bc | 1.01±0.077c   | 1.12±0.089bc  | 1.03±0.097c    |
| 55        | Decanal                 | 112-31-2   | floral, fried, orange, peel  | 4.56±0.029a   | 3.051±0.181d   | 3.649±0.086b  | 3.772±0.206b  | 3.351±0.053c  | 2.659±0.095e   |
| 56        | β-Cyclocitral           | 432-25-7   | herbal, rose, sweet          | 8.672±0.566a  | 8.313±0.812a   | 8.08±0.251a   | 8.113±0.111a  | 8.007±0.416a  | 6.384±0.344b   |
| 57        | (Z)-citral              | 106-26-3   | sweet, lemon, peel           | 4.546±0.268a  | 3.905±0.097b   | 4.813±0.099a  | 4.526±0.173a  | 4.763±0.205a  | 4.604±0.572a   |
| 58        | (2E)-2-Decenal          | 3913-81-3  | fat, fish, orange            | 1.195±0.031a  | 1.272±0.032a   | 0.993±0.014b  | 0.866±0.073c  | 0.703±0.048d  | 0.945±0.077bc  |
| 59        | (E)-citral              | 5392-40-5  | sharp, lemon, sweet          | 10.318±0.372a | 8.099±0.274b   | 7.746±0.212bc | 7.042±0.048d  | 7.505±0.52cd  | 5.325±0.256e   |
| 60        | (E)-2-Hexenal           | 6728-26-3  | green, banana, aldehydic     | 21.485±0.232b | 23.643±1.893ab | 25.067±2.177a | 24.351±1.113a | 25.081±1.567a | 22.594±1.593ab |
| 61        | (E)-2-Octenal           | 2548-87-0  | dandelion, fat, fruit        | 1.871±0.081b  | 2.245±0.013a   | 1.861±0.044b  | 1.814±0.165b  | 1.896±0.019b  | 1.914±0.052b   |
| 62        | (2E)-2-Nonenal          | 18829-56-6 | fatty, green, cucumber       | 2.543±0.02a   | 1.594±0.019b   | 1.211±0.041d  | 1.258±0.059cd | 1.304±0.024c  | 0.809±0.026e   |
| 63        | 10-Undecenal            | 112-45-8   | waxy, aldehydic, rose        | 0±0b          | 0±0b           | 0±0b          | 0±0b          | 0.401±0.006a  | 0±0b           |
| 64        | Pentanal                | 110-62-3   | almond, bitter, malt         | 0.071±0.003c  | 0.057±0.006d   | 0.083±0.007b  | 0.119±0.017a  | 0.056±0.007d  | 0.056±0.006d   |

|    |                          |            |                              |              |              |               |              |               |               |
|----|--------------------------|------------|------------------------------|--------------|--------------|---------------|--------------|---------------|---------------|
| 65 | (E)-2-Methylbut-2-enal   | 497-03-0   | strong, green                | 0.431±0.024a | 0.463±0.018a | 0.359±0.019b  | 0.364±0.027b | 0.158±0.003c  | 0.117±0.002d  |
| 66 | 2-Methyl-2-butenal       | 1115-11-3  | pungent, green               | 0.1±0.011a   | 0.074±0.005b | 0.048±0.002d  | 0.038±0.002e | 0.06±0.002c   | 0.024±0.001f  |
| 67 | (E)-2-Pentenal           | 1576-87-0  | pungent, green               | 0.506±0.015a | 0.521±0.017a | 0.483±0.046a  | 0.378±0.021b | 0.329±0.005c  | 0.14±0.025d   |
| 68 | 3-methylbut-2-enal       | 107-86-8   | sweet, fruity                | 0.381±0.007a | 0.32±0.008b  | 0.334±0.007b  | 0.314±0.061b | 0.143±0.018c  | 0.049±0.006d  |
| 69 | 3-Methyl-2-butenal       | 107-86-8   | almond, roasted              | 2.546±0.031a | 2.011±0.132b | 1.351±0.039c  | 1.399±0.098c | 0.475±0.022d  | 0.204±0.017e  |
| 70 | Hexanal                  | 66-25-1    | green, banana, fatty, cheesy | 0.707±0.051c | 0.691±0.028c | 0.746±0.027c  | 0.906±0.121b | 0.961±0.037b  | 1.176±0.095a  |
| 71 | Cyclopentanecarbaldehyde | 872-53-7   | null                         | 0.015±0e     | 0.027±0.001d | 0.031±0c      | 0.068±0.002a | 0.062±0.002b  | 0.067±0.004a  |
| 72 | 2-hexenal                | 505-57-7   | sweet, almond, fruity        | 0.96±0.01b   | 1.086±0.055a | 1.097±0.056a  | 1.073±0.012a | 0.114±0.015c  | 0.099±0.006b  |
| 73 | Heptanal                 | 111-71-7   | citrus, fat, green           | 0.186±0.004a | 0.139±0.014b | 0.16±0.012b   | 0.138±0.014b | 0.06±0.006c   | 0.06±0.004c   |
| 74 | Methional                | 3268-49-3  | cooked, potato, soy          | 0±0e         | 0.052±0.003c | 0.088±0.002a  | 0.063±0b     | 0.03±0.001d   | 0.036±0.003d  |
| 75 | (E,E)-2,4-Hexadienal     | 142-83-6   | sweet, green, spicy          | 0.24±0.028bc | 0.315±0.054a | 0.267±0.007ab | 0.227±0.03bc | 0.239±0.011bc | 0.205±0.021bc |
| 76 | (E,E)-2,4-Heptadienal    | 4313-03-5  | fat, nut                     | 0.33±0.006b  | 0.16±0.014c  | 0.121±0.014d  | 0.298±0.012b | 0.232±0.016b  | 0.384±0.048a  |
| 77 | Citronellal              | 106-23-0   | citrus, fat, leaf            | 0.113±0.012c | 0.121±0.006c | 0.174±0.006b  | 0.29±0.019a  | 0.157±0.012b  | 0.151±0.008b  |
| 78 | Dodecanal                | 112-54-9   | citrus, fat, lily            | 0.064±0.002d | 0.073±0.003c | 0.102±0.005a  | 0.076±0.001c | 0.086±0.006b  | 0.089±0.01b   |
| 79 | (Z)-9-tetradecenal       | 53939-27-8 | null                         | 0.017±0.001c | 0.02±0.002b  | 0.03±0.003a   | 0.024±0.002b | 0.028±0.001a  | 0.031±0.004a  |
| 80 | (E)-2-Hexadecenal        | 22644-96-8 | null                         | 0.001±0c     | 0.003±0b     | 0.002±0b      | 0.003±0b     | 0.001±0c      | 0.046±0.002a  |

#### Ketones

|    |                  |            |                       |              |               |              |               |              |               |
|----|------------------|------------|-----------------------|--------------|---------------|--------------|---------------|--------------|---------------|
| 81 | Jasmone          | 488-10-8   | woody, herbal, floral | 6.824±0.237c | 8.296±0.183ab | 8.662±0.782a | 8.55±0.303ab  | 7.929±0.287b | 6.192±0.341c  |
| 82 | β-ionone         | 79-77-6    | floral, violet        | 7.437±0.332a | 6.339±0.192b  | 5.948±0.047c | 5.575±0.247cd | 5.565±0.138d | 5.865±0.187cd |
| 83 | β-Ionone epoxide | 23267-57-4 | fruit, wood           | 1.7±0.143a   | 1.399±0.081bc | 1.406±0.006b | 1.279±0.016cd | 1.246±0.026d | 1.702±0.034a  |



|    |                                    |            |                          |               |              |              |              |              |              |
|----|------------------------------------|------------|--------------------------|---------------|--------------|--------------|--------------|--------------|--------------|
| 84 | $\beta$ -damascenone               | 23726-93-4 | apple, rose, honey       | 7.997±0.346a  | 5.285±0.317c | 5.914±0.015b | 5.606±0.2bc  | 5.442±0.191c | 5.324±0.022c |
| 85 | $\alpha$ -ionone                   | 127-41-3   | violet, wood             | 0.964±0.073ab | 0.883±0.05b  | 1.039±0.065a | 0.903±0.056b | 0.906±0.01b  | 0.748±0.063c |
| 86 | Neryl acetone                      | 3879-26-3  | fatty, metallic          | 0.782±0.016d  | 0.864±0.021d | 1.619±0.098a | 0.983±0.021c | 1.011±0.106c | 1.166±0.048b |
| 87 | 3-Penten-2-one                     | 625-33-2   | fruity, fishy            | 0.073±0.001a  | 0.034±0.003c | 0.028±0.001d | 0.045±0.006b | 0.025±0.002e | 0.022±0.001e |
| 88 | 2-Cyclopenten-1-one                | 930-30-3   | null                     | 1.229±0.068c  | 1.565±0.068a | 1.58±0.025a  | 1.641±0.185a | 1.329±0.073b | 1.143±0.119c |
| 89 | 6-Methylhept-5-en-2-one            | 110-93-0   | citrus, mushroom, pepper | 0.268±0.027b  | 0.324±0.02a  | 0.18±0.023c  | 0.149±0.007d | 0.119±0.003e | 0.064±0.004f |
| 90 | Vinylpyrrolidinone                 | 88-12-0    | null                     | 0.879±0.004d  | 0.212±0.008e | 2.238±0.175b | 1.99±0.084c  | 3.016±0.011a | 2.239±0.087b |
| 91 | 4-Isopropylcyclohexanone           | 5432-85-9  | null                     | 0.017±0.001b  | 0.019±0.001b | 0.018±0.001b | 0.01±0.002c  | 0.018±0.001b | 0.042±0.002a |
| 92 | 3-ethyl-4-methylpyrrole-2,5-dione  | 20189-42-8 | null                     | 0.019±0.002d  | 0.085±0.005c | 0.114±0.006b | 0.124±0.011b | 0.185±0.01a  | 0.163±0.018a |
| 93 | Geranylacetone                     | 3796-70-1  | fresh, fruity, waxy      | 0.105±0.012c  | 0.143±0.008b | 0.142±0.011b | 0.223±0.018a | 0.09±0.009c  | 0.026±0.002d |
| 94 | beta-Dihydro-ionone                | 17283-81-7 | earthy, woody, orris     | 0.129±0.014a  | 0.076±0c     | 0.106±0.003b | 0.02±0.002f  | 0.027±0.001e | 0.036±0.001d |
| 95 | 2,5-Di-tert-butyl-1,4-benzoquinone | 2460-77-7  | null                     | 0.048±0.004a  | 0.024±0.003b | 0.019±0.002c | 0.028±0.001b | 0.03±0.004b  | 0.027±0b     |

#### Acids and esters

|     |                                 |            |                            |               |               |               |               |               |               |
|-----|---------------------------------|------------|----------------------------|---------------|---------------|---------------|---------------|---------------|---------------|
| 96  | Hexanoic acid                   | 142-62-1   | cheese, oil, pungent, sour | 4.133±0.269a  | 3.013±0.296cd | 3.209±0.092bc | 3.425±0.081b  | 3.093±0.031bc | 2.793±0.274d  |
| 97  | Geranic acid                    | 459-80-3   | green, moldy, woody        | 12.153±0.568a | 9.963±0.157b  | 10.013±0.237b | 10.282±0.581b | 10.415±0.236b | 9.939±0.947b  |
| 98  | Methyl 2-methoxybenzoate        | 606-45-1   | floral                     | 1.065±0.008a  | 0.983±0.052b  | 0.925±0.012c  | 0.79±0.016d   | 0.756±0.017d  | 0.69±0.014e   |
| 99  | 2-(2-Butoxyethoxy)ethyl acetate | 124-17-4   | null                       | 2.191±0.141a  | 2.27±0.163a   | 2.421±0.248a  | 2.412±0.125a  | 2.144±0.135a  | 2.395±0.094a  |
| 100 | $\delta$ -Decalactone           | 705-86-2   | coconut                    | 0.788±0.026a  | 0.385±0.032c  | 0.453±0.01b   | 0.37±0.011c   | 0.279±0.002d  | 0.235±0.003e  |
| 101 | Dihydroactinidiolide            | 17092-92-1 | musk, coumarin             | 0.85±0.058a   | 0.708±0.042b  | 0.775±0.019ab | 0.759±0.06b   | 0.717±0.044b  | 0.774±0.015ab |
| 102 | Geranyl isovalerate             | 109-20-6   | apple, fruit, rose         | 0±0b          | 0±0b          | 0±0b          | 0±0b          | 0.421±0.041a  | 0±0b          |

|     |                                           |            |                                |               |                |                |               |               |                |
|-----|-------------------------------------------|------------|--------------------------------|---------------|----------------|----------------|---------------|---------------|----------------|
| 103 | Methyl salicylate                         | 119-36-8   | almond, caramel,<br>peppermint | 14.936±1.107d | 15.568±0.064cd | 17.382±1.288bc | 20.408±1.553a | 18.008±1.353b | 15.738±0.297cd |
| 104 | (E)-3-hexenoic acid                       | 1577-18-0  | powerful, fruity, honey        | 3.536±0.074c  | 7.435±0.197b   | 11.92±0.499a   | 11.463±0.642a | 11.557±0.192a | 11.609±0.215a  |
| 105 | 2-Ethyl-3-hydroxyhexyl 2-methylpropanoate | 74367-31-0 | null                           | 1.63±0.167c   | 1.593±0.03c    | 1.533±0.06c    | 1.631±0.028c  | 1.773±0.028b  | 2.339±0.065a   |
| 106 | (Z)-3-Hexenyl butyrate                    | 16491-36-4 | fresh, apple, wine             | 1.066±0.086e  | 1.192±0.093d   | 2.166±0.035c   | 2.43±0.076b   | 3.363±0.063a  | 1.199±0.027d   |
| 107 | linalyl formate                           | 115-99-1   | citrus, coriander              | 4.209±0.07cd  | 6.099±0.24a    | 4.395±0.099c   | 4.974±0.323b  | 4.252±0.407cd | 3.902±0.244d   |
| 108 | Isopentyl 3-hydroxy-2-methylenebutanoate  | 80758-72-1 | null                           | 2.537±0a      | 0.221±0.021c   | 0.239±0.03c    | 0.589±0.051b  | 0.579±0.009b  | 0±0d           |
| 109 | Menthyl acetate                           | 89-48-5    | mint, cool                     | 2.495±0.074a  | 2.074±0b       | 2.363±0.29a    | 1.195±0.115c  | 1.438±0.142c  | 1.071±0.168d   |
| 110 | Geranyl formate                           | 105-86-2   | floral                         | 1.148±0.087a  | 0.937±0.021b   | 0.622±0.012cd  | 0.602±0.002d  | 0.627±0.042cd | 0.678±0.03c    |
| 111 | (3Z)-3-Hexen-1-yl hexanoate               | 31501-11-8 | fruit, prune                   | 2.444±0.197d  | 2.906±0.051c   | 3.944±0.054a   | 3.607±0.109b  | 3.897±0.145a  | 2.516±0.106d   |
| 112 | Methyl 4-methyl valerate                  | 2412-80-8  | fruit                          | 0.011±0.001b  | 0.014±0.001a   | 0.008±0.001c   | 0.01±0.001b   | 0.009±0b      | 0.016±0.002a   |
| 113 | Isopentyl acrylate                        | 4245-35-6  | null                           | 0.074±0.007d  | 0.059±0.006e   | 0.08±0.004d    | 0.108±0.013c  | 1.711±0.105a  | 0.251±0.027b   |
| 114 | 2-hexen-4-olide                           | 2407-43-4  | spice                          | 0.012±0d      | 0.013±0d       | 0.027±0.001c   | 0.047±0.008b  | 0.068±0.011a  | 0.062±0.003a   |
| 115 | (E)-3-hexen-1-yl acetate                  | 3681-82-1  | fruit                          | 0.054±0.004d  | 0.079±0.011c   | 0.262±0.021a   | 0.158±0.027b  | 0.043±0.001e  | 0.021±0.003f   |
| 116 | γ-Caprolactone                            | 695-06-7   | herbal, coconut, sweet         | 0.798±0.078a  | 0.078±0.01f    | 0.122±0.011e   | 0.237±0.013c  | 0.37±0.039b   | 0.156±0.005d   |
| 117 | Allyl hexanoate                           | 123-68-2   | pineapple                      | 0.399±0.048b  | 0.304±0.01c    | 0.41±0.003b    | 0.414±0.04b   | 0.457±0.052a  | 0.242±0.018d   |
| 118 | N-heptanoic acid                          | 111-14-8   | apricot, floral, sour          | 0.197±0.008a  | 0.135±0.006b   | 0.104±0.01c    | 0.095±0.008cd | 0.095±0.003d  | 0.009±0.001e   |
| 119 | δ-Octalactone                             | 698-76-0   | coconut, peach                 | 0.04±0.005d   | 0.089±0.01b    | 0.055±0.008c   | 0.056±0.008c  | 0.09±0.009b   | 0.145±0.005a   |
| 120 | Decanoic acid                             | 334-48-5   | dust, fat, grass               | 0.209±0.013b  | 0.208±0.01b    | 0.161±0.004c   | 0.156±0.008c  | 0.154±0.015c  | 0.353±0.026a   |
| 121 | Ethyl 9-decenoate                         | 67233-91-4 | fruity, fatty                  | 0.045±0.002a  | 0.037±0.004b   | 0.02±0.002c    | 0.019±0.003d  | 0.04±0.005ab  | 0.043±0.006ab  |
| 122 | Methyl 9-oxononanoate                     | 1931-63-1  | null                           | 0.012±0.001d  | 0.026±0c       | 0.055±0.01a    | 0.036±0b      | 0.035±0.001b  | 0.025±0.002c   |

|                     |                         |            |                           |               |                |                |                 |               |                 |
|---------------------|-------------------------|------------|---------------------------|---------------|----------------|----------------|-----------------|---------------|-----------------|
| 123                 | Dimethyl phthalate      | 131-11-3   | odorless                  | 0.914±0.016c  | 0.718±0.035d   | 1.226±0.08a    | 1.096±0.091b    | 0.77±0.041d   | 0.737±0.059d    |
| 124                 | (Z)-8-Dodecenyl acetate | 28079-04-1 | null                      | 0.002±0e      | 0.008±0d       | 0.014±0.001b   | 0.01±0.001c     | 0.016±0.001b  | 0.05±0.006a     |
| 125                 | Methyl 4-heptylbenzoate | 6892-80-4  | null                      | 0.011±0.001d  | 0.012±0.001d   | 0.017±0.001c   | 0.013±0.002d    | 0.041±0.002b  | 0.053±0.002a    |
| 126                 | Trans-2-tetradecenal    | 51534-36-2 | citrus, waxy, fatty       | 0.015±0.002d  | 0.023±0c       | 0.04±0.004b    | 0.044±0.004b    | 0.045±0.004b  | 0.069±0.004a    |
| 127                 | Myristic acid           | 544-63-8   | burnt, cheese, harsh, oil | 0.004±0d      | 0.005±0.001c   | 0.005±0c       | 0.017±0b        | 0.003±0e      | 0.034±0.003a    |
| 128                 | Isopropyl myristate     | 110-27-0   | faint, oily, fatty        | 0.01±0.001d   | 0.033±0.002c   | 0.035±0.003c   | 0.09±0.016a     | 0.08±0.004b   | 0.084±0.007a    |
| 129                 | Diisobutyl phthalate    | 84-69-5    | null                      | 0.05±0.003c   | 0.085±0.003b   | 0.078±0.007b   | 0.082±0.004b    | 0.134±0.017a  | 0.109±0.009a    |
| 130                 | Dibutyl phthalate       | 84-74-2    | faint, odor               | 0.129±0.01e   | 0.224±0.011a   | 0.196±0.006b   | 0.17±0.008c     | 0.177±0.002c  | 0.156±0.006d    |
| 131                 | Palmitic acid           | 57-10-3    | slightly, waxy, fatty     | 0.052±0.006c  | 0.074±0.003b   | 0.061±0.007c   | 0.06±0.007c     | 0.079±0.007b  | 0.252±0.018a    |
| <b>Hydrocarbons</b> |                         |            |                           |               |                |                |                 |               |                 |
| 132                 | β-Myrcene               | 123-35-3   | balsamic, fruit, herb     | 14.135±0.942c | 14.271±0.11bc  | 15.549±1.218ab | 14.955±0.475abc | 15.977±0.789a | 15.464±0.595abc |
| 133                 | Tridecane               | 629-50-5   | null                      | 2.997±0.148a  | 2.959±0.192a   | 2.776±0.133a   | 2.484±0.192b    | 2.494±0.02b   | 1.671±0.171c    |
| 134                 | Tetradecane             | 629-59-4   | mild, waxy                | 1.352±0.062c  | 1.742±0.329abc | 1.867±0.058a   | 1.642±0.18abc   | 1.767±0.134ab | 1.456±0.367bc   |
| 135                 | Hexadecane              | 544-76-3   | null                      | 0.501±0.007bc | 0.519±0.012b   | 0.559±0.025a   | 0.477±0.011c    | 0.423±0.012d  | 0.433±0.024d    |
| 136                 | Dodecane                | 112-40-3   | alkane                    | 1.507±0.074c  | 1.624±0.024bc  | 1.93±0.046a    | 1.776±0.147ab   | 1.477±0.107c  | 0.755±0.071d    |
| 137                 | β-Caryophyllene         | 87-44-5    | fried, spice, wood        | 0±0c          | 0.762±0a       | 0.714±0.007b   | 0±0c            | 0±0c          | 0±0c            |
| 138                 | Cis-β-Farnesene         | 28973-97-9 | boiled, vegetable, floral | 1.182±0.154a  | 0.77±0.046c    | 0.93±0.019b    | 0.795±0.04c     | 0.762±0.057c  | 0.778±0.038c    |
| 139                 | α-Farnesene             | 502-61-4   | boiled, vegetable, floral | 0.758±0.074a  | 0.631±0.013b   | 0.564±0.007c   | 0.365±0.007d    | 0.412±0.016d  | 0.373±0.004d    |
| 140                 | (Z,E)-alpha-farnesene   | 26560-14-5 | boiled, vegetable, floral | 0±0c          | 0.286±0.022b   | 0.38±0.032a    | 0±0c            | 0±0c          | 0±0c            |
| 141                 | Epi-Cubebol             | 38230-60-3 | null                      | 0±0c          | 0±0c           | 0±0c           | 0.404±0.005b    | 0.494±0.024a  | 0±0c            |

|     |                                            |            |                                |              |              |               |               |               |               |
|-----|--------------------------------------------|------------|--------------------------------|--------------|--------------|---------------|---------------|---------------|---------------|
| 142 | $\beta$ -himachalene                       | 1461-03-6  | null                           | 0.298±0.003a | 0.172±0.015b | 0.183±0.01b   | 0.141±0.004c  | 0.143±0.007c  | 0.102±0.006d  |
| 143 | 2,3,5-Trimethylhexane                      | 1069-53-0  | null                           | 1.624±0.042c | 2.005±0.004a | 1.808±0.095b  | 1.369±0.062d  | 0.74±0.09e    | 0.296±0.047f  |
| 144 | 2,4-Dimethylheptane                        | 2213-23-2  | null                           | 0.368±0.029a | 0.293±0.006c | 0.328±0.035ab | 0.32±0.001b   | 0.13±0.017d   | 0.082±0.002e  |
| 145 | styrene                                    | 100-42-5   | sweet, balsam, floral          | 0.095±0.007a | 0.11±0.011a  | 0.098±0.011a  | 0.108±0.01a   | 0.068±0.004b  | 0.04±0.003c   |
| 146 | Dihydromyrcene                             | 2436-90-0  | herbal, citrus                 | 0.047±0.004f | 0.061±0.004e | 0.169±0.006d  | 0.3±0.033a    | 0.25±0.003b   | 0.216±0.008c  |
| 147 | Trans-4-decene                             | 19398-89-1 | null                           | 0.223±0.011b | 0.269±0.028a | 0.255±0.023a  | 0.097±0.005c  | 0.066±0.005d  | 0.045±0.006e  |
| 148 | (6E)-2,6-dimethylocta-2,6-diene            | 2792-39-4  | null                           | 0.643±0.068b | 0.596±0.053b | 0.673±0.063b  | 0.945±0.11a   | 0.267±0.016c  | 0.202±0.025d  |
| 149 | $\beta$ -pinene                            | 127-91-3   | woody, resinous, pine          | 0.175±0.011d | 0.169±0.018d | 0.235±0.012c  | 0.249±0.006c  | 0.349±0.029b  | 0.464±0.017a  |
| 150 | 3-(2-Methylpropyl)-1-cyclohexene           | 4104-56-7  | null                           | 0.17±0.007e  | 0.695±0.002a | 0.54±0.008b   | 0.339±0.004c  | 0.301±0.003d  | 0.336±0.043cd |
| 151 | Limonene                                   | 138-86-3   | citrus, herbal, camphor        | 0.158±0.022e | 0.199±0.027d | 0.28±0.03b    | 0.249±0.025c  | 0.425±0.047a  | 0.316±0.033b  |
| 152 | Pentylcyclopentane                         | 3741-00-2  | null                           | 0.474±0.024c | 0.141±0.007e | 0.677±0.003a  | 0.648±0.02b   | 0.529±0.066c  | 0.305±0.007d  |
| 153 | 2-methyldecane                             | 6975-98-0  | null                           | 0.757±0.077a | 0.614±0.016b | 0.329±0.02d   | 0.33±0.009d   | 0.362±0.021c  | 0.139±0.003e  |
| 154 | Terpinolene                                | 586-62-9   | fresh, woody, sweet            | 0.132±0.003c | 0.086±0.005e | 0.208±0.01a   | 0.174±0.001b  | 0.106±0.005d  | 0.093±0.004e  |
| 155 | 1-Undecyne                                 | 2243-98-3  | null                           | 0.269±0.004a | 0.251±0.003b | 0.25±0.014b   | 0.244±0.022b  | 0.132±0.018d  | 0.192±0.023c  |
| 156 | (3E,5E)-2,6-Dimethyl-1,3,5,7-octatetracene | 460-01-5   | null                           | 0.024±0.002d | 0.074±0.006c | 0.068±0.002c  | 0.094±0.007b  | 0.098±0.009b  | 0.147±0.016a  |
| 157 | 2,6,11-Trimethyldodecane                   | 31295-56-4 | null                           | 0.509±0.007a | 0.46±0.035b  | 0.354±0.013d  | 0.408±0.016c  | 0.326±0.02d   | 0.427±0.054bc |
| 158 | 2-decyloxirane                             | 2855-19-8  | null                           | 0.068±0.002b | 0.058±0.006c | 0.071±0.008ab | 0.069±0.006ab | 0.064±0.004bc | 0.075±0.003a  |
| 159 | (+)-Longifolene                            | 475-20-7   | sweet, woody, rose,<br>medical | 0.013±0.001c | 0.009±0e     | 0.024±0.002a  | 0.012±0d      | 0.017±0.002b  | 0.028±0.002a  |
| 160 | 2-methyltetradecane                        | 1560-95-8  | null                           | 0.253±0.016b | 0.202±0.004c | 0.29±0.023ab  | 0.268±0.008b  | 0.252±0.011b  | 0.297±0.009a  |
| 161 | Pentadecane                                | 629-62-9   | waxy                           | 0.06±0.004b  | 0.047±0.006c | 0.051±0.004c  | 0.057±0.005b  | 0.051±0.003c  | 0.075±0.004a  |

|        |                                                |            |                       |              |               |              |               |              |              |
|--------|------------------------------------------------|------------|-----------------------|--------------|---------------|--------------|---------------|--------------|--------------|
| 162    | 2,6,10-trimethyltetradecane                    | 14905-56-7 | null                  | 0.052±0.002  | 0.051±0.003   | 0.063±0.001  | 0.051±0.003   | 0.051±0.003  | 0.114±0.013  |
| 163    | 2,6,10,14-Tetramethylpentadecane               | 1921-70-6  | null                  | 0.024±0.001  | 0.038±0.002   | 0.041±0.005  | 0.037±0.004   | 0.033±0.002  | 0.079±0.007  |
| 164    | 1,2-Epoxyhexadecane                            | 7320-37-8  | null                  | 0.017±0.002c | 0.025±0b      | 0.034±0.002a | 0.032±0.004a  | 0.03±0.002a  | 0.036±0.004a |
| 165    | Heptadecane                                    | 629-78-7   | null                  | 0.019±0.001f | 0.029±0.001e  | 0.039±0.002c | 0.033±0.002d  | 0.061±0.002b | 0.075±0.01a  |
| 166    | Octadecane                                     | 593-45-3   | null                  | 0.013±0.001e | 0.022±0.001d  | 0.028±0.004c | 0.037±0.006c  | 0.078±0a     | 0.057±0.004b |
| 167    | Nonadecane                                     | 629-92-5   | bland                 | 0.021±0.002d | 0.031±0.002c  | 0.17±0.005a  | 0.018±0.002d  | 0.06±0.006b  | 0.03±0c      |
| 168    | 1,2-Epoxyoctadecane                            | 7390-81-0  | null                  | 0.007±0e     | 0.01±0.001c   | 0.012±0.002c | 0.008±0.001d  | 0.031±0.003a | 0.019±0.001b |
| 169    | Icosane                                        | 112-95-8   | waxy                  | 0.004±0c     | 0.002±0d      | 0.017±0.001a | 0.012±0.001b  | 0.019±0.001a | 0.013±0.001b |
| Others |                                                |            |                       |              |               |              |               |              |              |
| 170    | Indole                                         | 120-72-9   | burnt, mothball       | 0±0d         | 1.166±0.032b  | 1.49±0.194a  | 0.864±0.01c   | 0.795±0.083c | 0±0d         |
| 171    | 2,6,10,10-Tetramethyl-1-oxaspiro[4.5]dec-6-ene | 36431-72-8 | honey                 | 3.417±0.024a | 3.153±0.04b   | 3.093±0.137b | 2.834±0.179c  | 2.252±0.212d | 1.547±0.132e |
| 172    | 2-Methyltetrahydrofuran                        | 96-47-9    | null                  | 1.024±0.087b | 1.113±0.101ab | 1.123±0.055a | 1.073±0.103b  | 0.734±0.007c | 0.454±0.037d |
| 173    | 3,4-Dihydro-2H-pyran                           | 110-87-2   | null                  | 0.126±0.003c | 0.141±0.008b  | 0.156±0.003a | 0.155±0.012ab | 0.112±0.003d | 0.104±0.013d |
| 174    | 3-methyl-4,5-dihydrofuran                      | 34314-83-5 | null                  | 0.361±0.032a | 0.141±0.007e  | 0.279±0.029b | 0.212±0.008c  | 0.195±0.005d | 0.089±0.003f |
| 175    | 2-Ethylpyrazine                                | 13925-00-3 | burnt, green          | 0.05±0.004c  | 0.103±0.006b  | 0.107±0.001b | 0.114±0.009b  | 0.165±0.007a | 0.156±0.008a |
| 176    | 1-ethylpyrrole-2-carbaldehyde                  | 2167-14-8  | burnt, roasted, smoky | 0.856±0.115c | 1.843±0.063a  | 2.027±0.013a | 2.048±0.216a  | 1.607±0.056b | 1.553±0.232b |
| 177    | Caryophyllene Oxide                            | 1139-30-6  | herb, must, spice     | 0.004±0e     | 0.026±0.003c  | 0.032±0.002b | 0.03±0.003bc  | 0.091±0.013a | 0.006±0d     |
| 178    | Diosphenol                                     | 490-03-9   | minty, black, currant | 0.157±0.012a | 0.121±0.005b  | 0.103±0.006c | 0.103±0.004c  | 0.108±0.004c | 0.066±0.001d |
| 179    | Butylated hydroxytoluene                       | 128-37-0   | toasted, cereal       | 0.045±0.003d | 0.085±0.004c  | 0.119±0.014a | 0.117±0.016a  | 0.111±0.006a | 0.097±0.008b |
| 180    | 2,5-Di-tert-butylphenol                        | 5875-45-6  | null                  | 0.085±0.001b | 0.031±0.001e  | 0.035±0.002d | 0.034±0.003de | 0.044±0.002c | 0.178±0.014a |

Figures S1. Aromatic amino acid content of black tea with different degrees of sun withering.

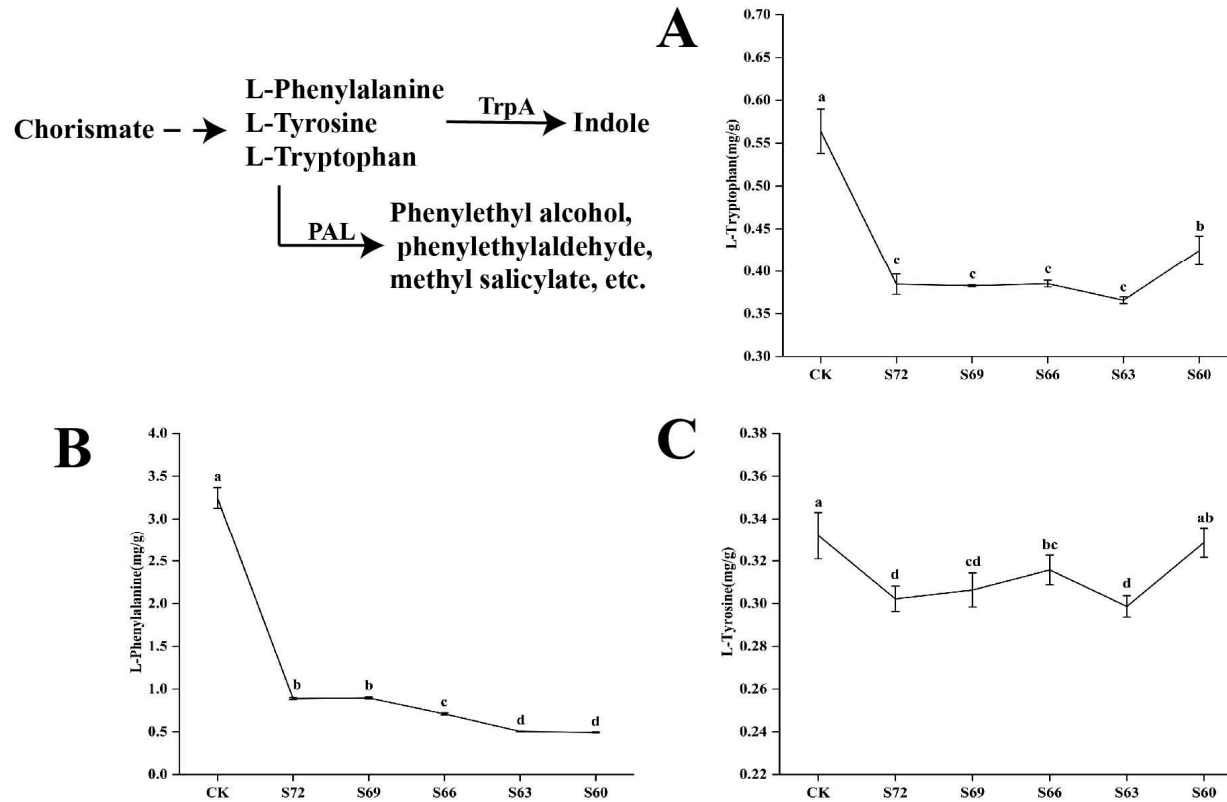

Note: (A) L-tryptophan. (B) L-phenylalanine. (C) L-tyrosine. Trp A:  $\alpha$ -branched-chain tryptophan synthase, PAL: phenylalanine deaminase. Different lowercase letters on the curve indicate significant differences between groups at  $P < 0.05$  level.

Figure S2. Key volatiles content of black tea with different degrees of sun withering.

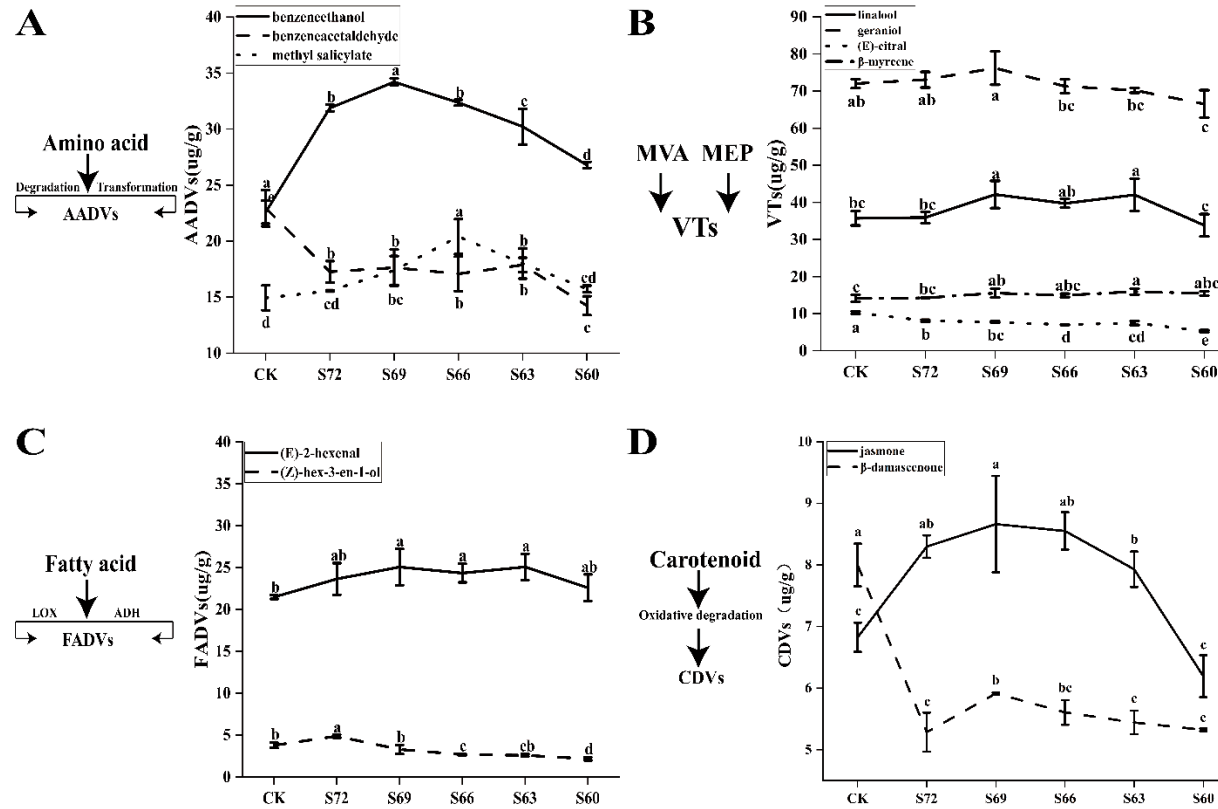

Note: (A) AADVs volatiles. (B) VTs volatiles. (C) FADVs volatiles. (D) CDVs volatiles. MVA: Mevalonate pathway. MEP: methylerythritol phosphate pathway. LOX: Lipoxygenase. ADH: Alcohol dehydrogenase. Different lowercase letters on the curves indicate significant differences between groups at  $P < 0.05$  level.
